# Supplementary material
Source: PubMed Central journal article supplement (PMC3519384)
Supplement: NIHMS423419-supplement-1_si_001.pdf [file NIHMS423419-supplement-1_si_001.pdf]

## SUPPLEMENTARY MATERIALS

### **Title: Amino Termini of Many Yeast Proteins Map to Downstream Start Codons**

**Authors:** Claire T. Fournier<sup>1,3</sup>, Justin J. Cherny<sup>1,3</sup>, Kris Truncali<sup>1,2,†</sup>, Adam Robbins-Pianka<sup>1,2,‡</sup>, Miin S. Lin<sup>1</sup>, Danny Krizanc<sup>2</sup> and Michael P. Weir<sup>1\*</sup>

#### **Affiliations:**

<sup>1</sup>Department of Biology, Wesleyan University Middletown CT 06459.

<sup>2</sup>Department of Mathematics and Computer Science, Wesleyan University Middletown CT 06459.

<sup>3</sup>Contributed equally.

\*Correspondence to: [mweir@wesleyan.edu](mailto:mweir@wesleyan.edu).

†Current address: Boehringer Ingelheim Pharmaceuticals, 900 Ridgebury Road, Ridgefield CT 06877.

‡Current address: University of Colorado Boulder, Computer Science, Boulder, CO 80309.

## Supplementary Materials

Supplementary Methods and Results

Supplementary Figures

Supplementary Tables

Supplementary Files

## Supplementary Methods and Results

### TAP-tagged Protein Purification

TAP-tag constructs (1) for selected downPeptide genes were expressed as described (2). 1 or 2 liters of cells were grown to early log phase and collected by centrifugation. Pelleted cells were resuspended in 5 ml of Hepes lysis buffer (100mM Hepes-KOH, pH 8-8.5, 20mM Mg(OAc)<sub>2</sub>, 10% glycerol, 10mM EGTA, 0.1mM EDTA, 0.4% NP-40, 100mM PMSF in ETOH, and 2 mini-tablet protease inhibitors (Roche)) and vortexed with glass beads for lysis. The lysate was then spun at 6,000 RPM to remove cell debris and the supernatant was collected and incubated with 3 mg (100  $\mu$ l) of Dynabeads (Invitrogen) coupled to whole molecule rabbit IgG (Invitrogen) for 1 hr at 4°C. Following a water rinse, the beads were collected and boiled with 50  $\mu$ l sample buffer to elute the bound proteins. The sample was run on a 10% SDS-PAGE gel, fixed, and stained with colloidal coomassie (Invitrogen). The bands of interest were excised and digested in-gel according to Shevchenko et al. (3). The peptides were resuspended in 0.1% TFA and loaded onto a C18 resin packed column for MS/MS analysis. The enhanced protein coverage of partially purified TAP-tagged proteins allowed confirmation of downPeptide expression (see Results and Discussion)

### Translation Relative Individual Information (TRII score) measurement

The sequences flanking the annAUGs of downPeptide and annPeptide mRNAs were compared using a positional weight matrix computed from high-confidence translation initiation sites (4, 5). The weight matrix was used to compute Translation Relative Individual Information (TRII) scores which indicate how well individual sequences conform to the high-confidence sites.

### Ribosome profiles

Ribosome profiles (6) for aligned dnAUGs showed tag density patterns consistent with translation initiation at dnAUGs. The ribosome profiling results of Ingolia et al. (6) are striking in that the profiles of sequence tags protected by ribosomes outline the expressed open reading frames of genes with nucleotide resolution. For example, when tag profiles were aligned to the annAUGs of annPeptide genes detected in this study, high densities of tags were observed centered at positions 2, 3 and 15 (arrowheads, Fig. 4A) with a characteristic depression surrounding position 15 (arrow) mirroring the previously published profiles of aligned translation start sites (6). Profile alignment relative to dnAUGs of downPeptide genes revealed ribosome profiles with elevated densities at positions 2 and 15, and depressed densities surrounding 15. This profile was more pronounced for a subset of downPeptide genes with lower quality sequence context surrounding their annAUGs (Fig. 4B; Translation Relative

Individual Information (TRII) score less than 8; (4, 5)), suggesting that genes with poor context surrounding their annAUG are more likely to have translation initiation at a dnAUG.

In light of these observations, we examined ribosome profiles of aligned rank 1 dnAUGs for all genes with an annAUG sequence context TRII score  $< 8$  (1267 genes). Only genes with ribosome tag densities above 0.1 tags/nt in the first 200 nt of their annORF were analyzed. The average ribosome profile for these genes (where each gene received equal weight; Fig. 4C) shows elevated ribosome tag densities at positions 2 and 15, suggesting that translation initiation occurs at dnAUGs in many of these genes. In contrast, genes with higher quality sequence context at their annAUG (TRII  $\geq 10$ ; 1372 genes; Fig. 4D) show less pronounced signals at positions 2 and 15, suggesting lower levels of translation initiation at their dnAUGs. These results, which are independent of our mass spectrometry analysis, also suggest that dnAUG translation initiation is common in yeast, particularly for genes with poorer context annAUGs.

Compared to profiles of multiple gene alignments, the ribosome profiles of individual downPeptide genes tend to have low signal and be noisy; nevertheless, individual gene profiles for several high-expression genes identified in our mass spectroscopy analysis had patterns consistent with leaky scanning (Supplementary Fig. S6A) in which the ribosome density showed a significant increase at the dnAUG. Other individual genes showed background tag densities 5' of the dnAUG (Supplementary Fig. S6B), suggesting that the principal initiation is at the dnAUG.

#### Protein sequence conservation

Under-utilization of the annAUGs in downPeptide genes might be expected to be associated with poorer conservation across species of the annAUG region. Indeed, assessment of conservation in four species of *Saccharomyces* has been used to refine the annotations of the N-termini of proteins (7). Orthologs have been identified (8) based on an alignment algorithm that takes into account chromosome synteny as well as conservation of individual gene sequences. Conservation of protein sequences was assessed for the subset of *Saccharomyces cerevisiae* downPeptide genes in which the annAUG and dnAUG are in the same reading frame. The protein sequences of these downPeptide genes were assessed in *Saccharomyces cerevisiae* and the three other yeast species. Following alignment with ClustalW (9), protein conservation at the annAUG and dnAUG were scored using windows of 12 amino acids in width (see Supplementary Fig. S3 legend). DownPeptide genes with lower TRII score annAUGs (TRII  $< 8$ ) have poorer conservation at the annAUG window compared to the dnAUG window (Supplementary Fig. S3), consistent with the interpretation that some of these genes have little or no selection in the annAUG region – presumably because this region is not translated (reflecting possible misannotation), or codes for protein of limited functional importance.

To investigate this further, codon bias was assessed in the vicinity of the implicated dnAUGs of the frame 1 downPeptide genes. The Codon Adaptation Index (CAI (10)) provides a quantification of codon bias; the most common codon for each amino acid is assigned a CAI score of 100% and the less common codons are assigned proportionally lower scores. More highly expressed proteins tend to utilize codons with higher CAI index. Our assessment of CAI scores indicated that codons immediately downstream of the implicated dnAUG in downPeptide genes tend to have higher mean CAI scores than codons between the annAUG and the dnAUG (Supplementary Fig. S4B). Bootstrap analysis (Supplementary Fig. S4C) indicated that this

increase in CAI score is unlikely to be random ( $p = 0.05$  for 1% false identification set). The increase compares in magnitude with that observed at the annAUGs of annPeptide genes (Supplementary Fig. S4A), and is considerably higher than the increase at control dnAUGs (not shown). This increase in codon bias at dnAUGs is consistent with translation initiation at these sites, and reduced (or no) initiation at annAUGs.

#### Protein motif prediction and Gene Ontology (GO)

Translation initiation at dnAUGs may be important in orchestrating the cellular functions of protein products. Proteins resulting from initiation at a dnAUG in the same reading frame as the annAUG may result in N-terminal truncated proteins with different targeting signals thereby allowing expression of the protein in alternative cellular compartments (11, 12). Indeed, for many downPeptide genes (25), ER signal sequences are predicted by the SignalP algorithm to be located between the annAUG and dnAUG (Supplementary Table S7). In some cases, signal peptide cleavage sites are predicted, whereas in other cases, there is a potential signal sequence, but no cleavage site is predicted, suggesting that the longer protein product could become anchored to the ER membrane, whereas the shorter downPeptide product lacking a signal sequence could instead enter the cytoplasm. Cases of sequences associated with enzyme activities are predicted by the InterProScan algorithm between the annAUG and dnAUG (Supplementary Table S8). The amino acid composition coded between the annAUG and dnAUG of downPeptide genes had a greater tendency towards predicted disorder than the equivalent regions of randomly selected genes (Supplementary Fig. S6), which in some cases could facilitate association with regulatory cofactors (13).

We assessed the frequencies with which Gene Ontology (GO) terms (14) are associated with downPeptide and annPeptide genes. The frequencies of some GO terms were significantly different for the two gene sets (Supplementary Table S9). However, similar trends were observed when comparing GO term frequencies for high protein expression genes with frequencies for all genes, consistent with our observation that annPeptide genes show a trend towards higher protein expression than downPeptide genes.

# Supplementary Figures

## Suppl. Fig. S1

| Charge +1 |    |         |         | +2      |    |    |    | +3     |        |        |    |    |    |        |        |        |    |
|-----------|----|---------|---------|---------|----|----|----|--------|--------|--------|----|----|----|--------|--------|--------|----|
| AA        | A  | B       | Y       | AA      | A  | B  | Y  | AA     | A      | B      | Y  |    |    |        |        |        |    |
| 1         | SI | 128.04  | 156.04  | -       | 17 | 1  | SI | 43.35  | 52.89  | -      | 17 | 1  | SI | 64.53  | 78.52  | -      | 17 |
| 2         | V  | 227.11  | 255.11  | 1973.06 | 16 | 2  | V  | 76.38  | 85.71  | 858.36 | 16 | 2  | V  | 114.06 | 128.06 | 907.03 | 16 |
| 3         | L  | 340.20  | 368.19  | 1873.99 | 15 | 3  | L  | 114.07 | 123.40 | 825.33 | 15 | 3  | L  | 179.60 | 184.60 | 937.65 | 15 |
| 4         | F  | 487.27  | 515.26  | 1780.91 | 14 | 4  | F  | 163.09 | 172.42 | 597.64 | 14 | 4  | F  | 244.14 | 258.13 | 880.96 | 14 |
| 5         | W  | 672.33  | 701.34  | 1613.84 | 13 | 5  | W  | 225.12 | 234.45 | 538.62 | 13 | 5  | W  | 337.18 | 351.17 | 807.42 | 13 |
| 6         | I  | 786.43  | 814.42  | 1427.76 | 12 | 6  | I  | 262.81 | 272.15 | 476.59 | 12 | 6  | I  | 393.72 | 407.72 | 714.98 | 12 |
| 7         | M  | 917.47  | 945.46  | 1314.67 | 11 | 7  | M  | 306.49 | 315.83 | 436.90 | 11 | 7  | M  | 459.24 | 473.24 | 657.84 | 11 |
| 8         | A  | 888.51  | 916.50  | 1193.83 | 10 | 8  | A  | 330.17 | 339.51 | 395.22 | 10 | 8  | A  | 494.76 | 508.75 | 662.32 | 10 |
| 9         | P  | 1085.66 | 1113.65 | 1113.69 | 9  | 9  | P  | 362.52 | 371.86 | 371.54 | 9  | 9  | P  | 543.26 | 557.26 | 658.80 | 9  |
| 10        | K  | 1213.65 | 1241.65 | 1015.54 | 8  | 10 | K  | 405.22 | 414.55 | 339.19 | 8  | 10 | K  | 607.33 | 621.33 | 506.20 | 8  |
| 11        | N  | 1327.70 | 1355.69 | 887.45  | 7  | 11 | N  | 443.24 | 452.57 | 296.49 | 7  | 11 | N  | 684.35 | 670.35 | 444.23 | 7  |
| 12        | H  | 1441.74 | 1469.73 | 773.41  | 6  | 12 | H  | 481.25 | 490.58 | 258.47 | 6  | 12 | H  | 721.37 | 735.37 | 387.21 | 6  |
| 13        | O  | 1566.80 | 1594.79 | 659.35  | 5  | 13 | O  | 523.84 | 533.17 | 220.46 | 5  | 13 | O  | 785.40 | 799.40 | 330.15 | 5  |
| 14        | A  | 1640.84 | 1668.83 | 531.30  | 4  | 14 | A  | 547.62 | 556.95 | 177.77 | 4  | 14 | A  | 830.82 | 834.82 | 266.16 | 4  |
| 15        | V  | 1739.90 | 1767.90 | 460.27  | 3  | 15 | V  | 580.64 | 589.97 | 154.09 | 3  | 15 | V  | 870.46 | 884.45 | 230.64 | 3  |
| 16        | W  | 1925.98 | 1953.98 | 361.20  | 2  | 16 | W  | 642.67 | 652.00 | 121.07 | 2  | 16 | W  | 963.50 | 977.49 | 181.10 | 2  |
| 17        | R  | -       | -       | 175.12  | 1  | 17 | R  | -      | -      | 59.04  | 1  | 17 | R  | -      | -      | 68.06  | 1  |

*VMA9*  
id\_28508\_1049\_to\_1220\_frame\_1\_trimmed\_1  
ions 30/96

|   |   |   |   |   |   |   |   |   |   |   |
|---|---|---|---|---|---|---|---|---|---|---|
| S | V | L | F | V | I | H | A | P | K | N |
|---|---|---|---|---|---|---|---|---|---|---|

#2952-2952 RT:74.79-74.79 NL:3.01E4

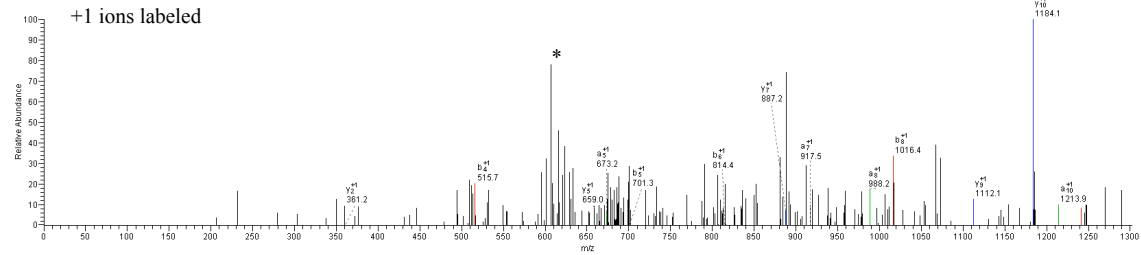

| Charge +1 |    |        |        | +2     |   |    |       |        |        |        |   |
|-----------|----|--------|--------|--------|---|----|-------|--------|--------|--------|---|
| AA        | A  | B      | Y      | AA     | A | B  | Y     |        |        |        |   |
| 1         | SI | 128.04 | 156.04 | 5      | 1 | SI | 64.53 | 78.52  | 9      |        |   |
| 2         | S  | 215.08 | 243.07 | 918.51 | 7 | 2  | S     | 100.04 | 122.04 | 459.76 | 7 |
| 3         | T  | 318.12 | 344.12 | 831.48 | 6 | 3  | T     | 159.57 | 172.56 | 416.24 | 6 |
| 4         | V  | 415.19 | 443.19 | 730.49 | 5 | 4  | V     | 208.10 | 222.10 | 365.72 | 5 |
| 5         | I  | 529.29 | 559.27 | 631.37 | 4 | 5  | I     | 284.64 | 276.64 | 316.19 | 4 |
| 6         | K  | 724.37 | 752.37 | 518.28 | 3 | 6  | K     | 362.89 | 376.89 | 259.84 | 3 |
| 7         | F  | 871.44 | 899.43 | 322.19 | 2 | 7  | F     | 436.22 | 450.22 | 181.80 | 2 |
| 8         | R  | -      | -      | 175.12 | 1 | 8  | R     | -      | -      | 98.06  | 1 |

*RPNI3*  
id\_4413\_1007\_to\_1469\_frame\_1\_trimmed\_1  
ions 13/21

|   |   |   |   |   |   |   |
|---|---|---|---|---|---|---|
| S | V | T | I | K | F | R |
|---|---|---|---|---|---|---|

#96-88 RT:1.40-1.40 NL:4.15E6

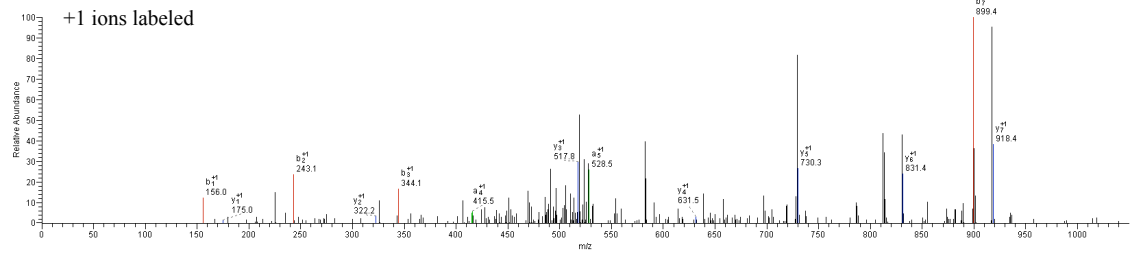

| Charge +1 |   |        |        | +2     |   |   |   |        |        |        |   |
|-----------|---|--------|--------|--------|---|---|---|--------|--------|--------|---|
| AA        | A | B      | Y      | AA     | A | B | Y |        |        |        |   |
| 1         | V | 140.08 | 168.08 | -      | 5 | 1 | V | 70.54  | 84.54  | -      | 5 |
| 2         | V | 239.15 | 267.14 | 488.34 | 4 | 2 | V | 120.08 | 134.08 | 243.67 | 4 |
| 3         | L | 352.23 | 380.23 | 387.27 | 3 | 3 | L | 179.62 | 193.62 | 194.14 | 3 |
| 4         | V | 451.30 | 479.30 | 274.19 | 2 | 4 | V | 228.15 | 240.15 | 137.60 | 2 |
| 5         | R | -      | -      | 175.12 | 1 | 5 | R | -      | -      | 88.06  | 1 |

*GSP1*  
id\_4284\_1059\_to\_1098\_frame\_2\_trimmed\_1  
ions 9/14

|   |   |   |   |   |
|---|---|---|---|---|
| V | V | L | V | R |
|---|---|---|---|---|

#544-544 RT:8.98-8.98 NL:6.02E6

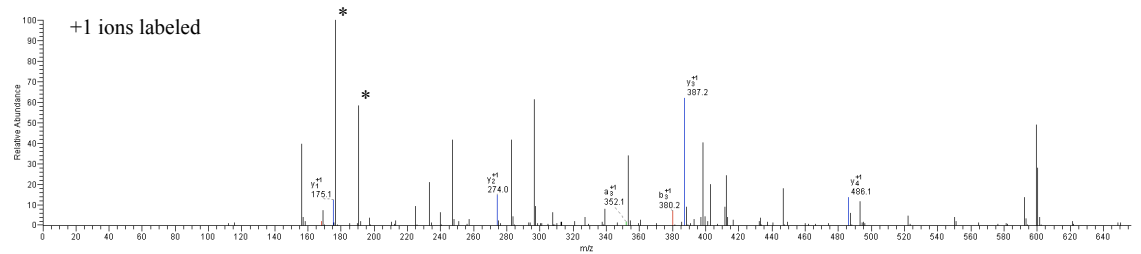

Suppl. Fig. S1 (cont.)

| Charge +1 |   |        |        |        | Charge +2 |   |        |        |        |
|-----------|---|--------|--------|--------|-----------|---|--------|--------|--------|
| AA        | A | B      | Y      |        | AA        | A | B      | Y      |        |
| 1         | M | 172.05 | 200.05 | -      | 7         | I | 86.53  | 100.53 | -      |
| 2         | I | 285.14 | 313.13 | 782.43 | 8         | I | 143.07 | 157.07 | 381.72 |
| 3         | P | 382.19 | 410.18 | 683.36 | 5         | P | 191.60 | 205.60 | 335.18 |
| 4         | M | 525.23 | 557.22 | 872.30 | 4         | M | 265.12 | 279.11 | 206.65 |
| 5         | L | 842.31 | 870.30 | 432.26 | 3         | L | 331.66 | 335.66 | 215.13 |
| 6         | H | 779.37 | 807.36 | 312.18 | 2         | H | 390.19 | 404.19 | 156.59 |
| 7         | R | -      | -      | 175.12 | 1         | R | -      | -      | 88.06  |

ZRG17  
id\_5322\_1080\_to\_1116\_frame\_2  
ions 11/14

| I |  |  |  |  | P |  |  |  |  | M |  |  |  |  | L |  |  |  |  | H |  |  |  |  | R |  |  |  |  |
|---|--|--|--|--|---|--|--|--|--|---|--|--|--|--|---|--|--|--|--|---|--|--|--|--|---|--|--|--|--|
|---|--|--|--|--|---|--|--|--|--|---|--|--|--|--|---|--|--|--|--|---|--|--|--|--|---|--|--|--|--|

#2827-2827 RT:73.50-73.50 NL: 1.27E5

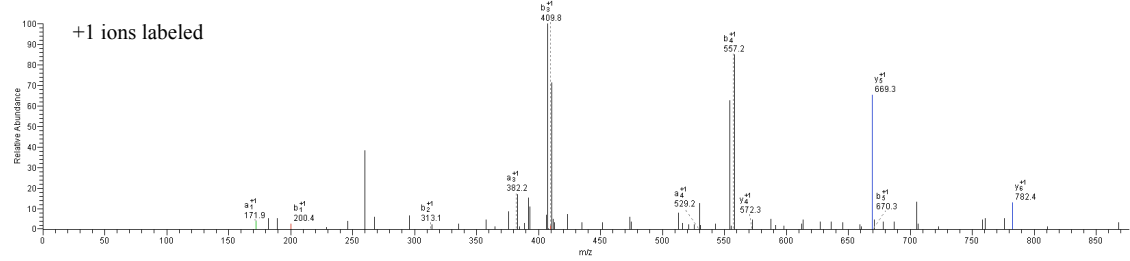

| Charge +1 |   |         |         |         | Charge +2 |   |        |        |        | Charge +3 |   |        |        |        |
|-----------|---|---------|---------|---------|-----------|---|--------|--------|--------|-----------|---|--------|--------|--------|
| AA        | A | B       | Y       |         | AA        | A | B      | Y      |        | AA        | A | B      | Y      |        |
| 1         | T | 142.06  | 170.05  | -       | 11        | T | 71.53  | 85.53  | -      | 11        | T | 48.02  | 57.36  | -      |
| 2         | I | 295.14  | 281.14  | 1235.53 | 10        | J | 138.08 | 142.07 | 618.32 | 10        | I | 86.72  | 95.05  | 412.24 |
| 3         | M | 386.18  | 414.18  | 1122.55 | 9         | M | 193.60 | 207.59 | 661.78 | 9         | M | 129.40 | 138.73 | 374.65 |
| 4         | D | 501.21  | 529.21  | 991.51  | 8         | D | 251.11 | 265.11 | 496.26 | 8         | D | 167.74 | 177.07 | 331.17 |
| 5         | W | 887.20  | 715.20  | 876.48  | 7         | W | 344.15 | 358.15 | 438.74 | 7         | W | 229.77 | 239.10 | 292.63 |
| 6         | E | 816.33  | 844.33  | 650.40  | 6         | E | 459.67 | 432.67 | 345.71 | 6         | E | 272.76 | 260.11 | 239.81 |
| 7         | V | 915.40  | 943.40  | 561.36  | 5         | V | 458.20 | 472.20 | 281.18 | 5         | V | 305.81 | 315.14 | 187.79 |
| 8         | T | 1015.45 | 1044.44 | 462.20  | 4         | T | 588.73 | 522.73 | 231.85 | 4         | T | 339.49 | 348.82 | 154.77 |
| 9         | T | 1117.50 | 1145.49 | 381.24  | 3         | T | 539.25 | 573.25 | 181.13 | 3         | T | 372.17 | 382.50 | 131.05 |
| 10        | L | 1230.58 | 1258.58 | 260.20  | 2         | L | 615.79 | 629.79 | 130.60 | 2         | L | 410.87 | 420.20 | 87.40  |
| 11        | K | -       | -       | 147.11  | 1         | K | -      | -      | 74.06  | 1         | K | -      | -      | 49.71  |

YAL026C-A  
id\_28730\_1064\_to\_1436\_frame\_1\_trimmed\_1  
ions 18/60

| T |  |  |  |  | I |  |  |  |  | M |  |  |  |  | D |  |  |  |  | V |  |  |  |  | E |  |  |  |  | V |  |  |  |  |
|---|--|--|--|--|---|--|--|--|--|---|--|--|--|--|---|--|--|--|--|---|--|--|--|--|---|--|--|--|--|---|--|--|--|--|
|---|--|--|--|--|---|--|--|--|--|---|--|--|--|--|---|--|--|--|--|---|--|--|--|--|---|--|--|--|--|---|--|--|--|--|

#2069-2069 RT:54.07-54.07 NL: 1.38E5

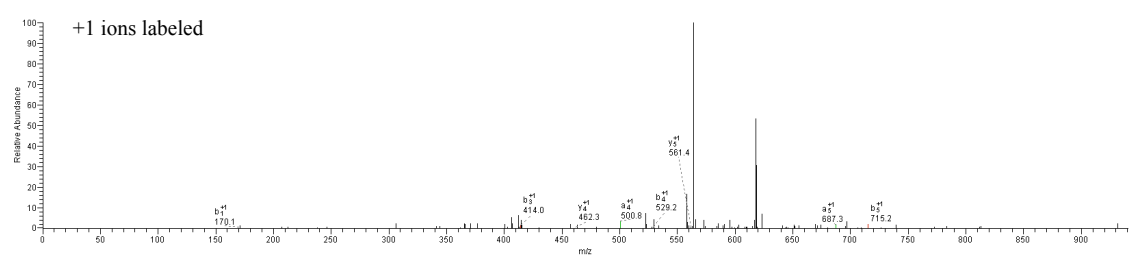

| Charge +1 |    |        |        |        | Charge +2 |    |        |        |        | Charge +3 |    |        |        |        |
|-----------|----|--------|--------|--------|-----------|----|--------|--------|--------|-----------|----|--------|--------|--------|
| AA        | A  | B      | Y      |        | AA        | A  | B      | Y      |        | AA        | A  | B      | Y      |        |
| 1         | M  | 172.05 | 200.05 | -      | 7         | M  | 86.53  | 100.53 | -      | 7         | M  | 58.02  | 67.35  | -      |
| 2         | E  | 331.10 | 323.09 | 780.43 | 6         | E  | 151.05 | 155.05 | 385.71 | 6         | E  | 101.04 | 110.37 | 264.14 |
| 3         | K* | 497.19 | 525.19 | 661.30 | 5         | K* | 249.10 | 263.10 | 331.19 | 5         | K* | 166.40 | 175.73 | 221.13 |
| 4         | P  | 584.24 | 622.24 | 465.20 | 4         | P  | 297.63 | 311.62 | 233.14 | 4         | P  | 190.75 | 200.08 | 155.77 |
| 5         | V  | 893.31 | 721.31 | 383.23 | 3         | V  | 347.10 | 381.10 | 164.62 | 3         | V  | 231.78 | 241.11 | 123.41 |
| 6         | L  | 906.40 | 834.39 | 269.16 | 2         | L  | 453.70 | 417.70 | 135.08 | 2         | L  | 265.47 | 278.80 | 90.39  |
| 7         | H  | -      | -      | 158.06 | 1         | H  | -      | -      | 78.54  | 1         | H  | -      | -      | 52.70  |

AEPI  
id\_4668\_1030\_to\_1051\_frame\_3  
ions 13/36

| M |  |  |  |  | E |  |  |  |  | K |  |  |  |  | P |  |  |  |  |
|---|--|--|--|--|---|--|--|--|--|---|--|--|--|--|---|--|--|--|--|
|---|--|--|--|--|---|--|--|--|--|---|--|--|--|--|---|--|--|--|--|

#472-472 RT:12.31-12.31 NL: 3.55E4

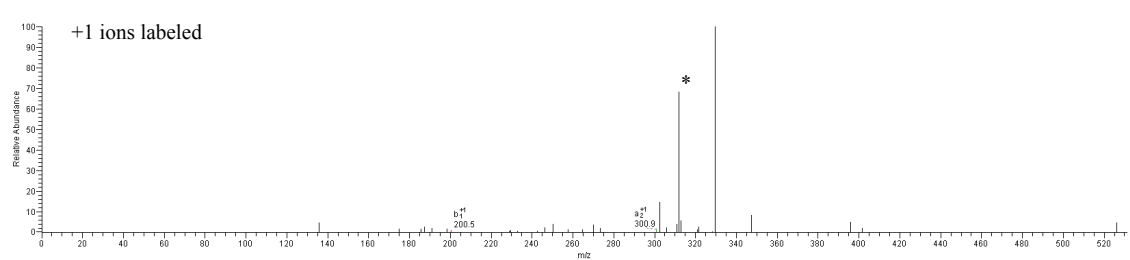

Suppl. Fig. S1 (cont.)

| Charge +1 |         |         |         |     | +2   |         |         |         |     | +3   |        |        |        |     |
|-----------|---------|---------|---------|-----|------|---------|---------|---------|-----|------|--------|--------|--------|-----|
| AA        | A       | B       | Y       | -   | AA   | A       | B       | Y       | -   | AA   | A      | B      | Y      | -   |
| 1 M       | 172.05  | 200.05  |         | -22 | 1 M  | 86.53   | 100.53  |         | -22 | 1 M  | 58.02  | 67.35  |        | -22 |
| 2 S       | 259.08  | 287.08  | 2220.41 | 21  | 2 S  | 130.05  | 144.04  | 1115.71 | 21  | 2 S  | 87.03  | 96.36  | 744.14 | 21  |
| 3 I       | 372.17  | 400.16  | 2143.35 | 20  | 3 I  | 186.59  | 200.59  | 1072.19 | 20  | 3 I  | 124.73 | 134.06 | 715.13 | 20  |
| 4 I       | 485.25  | 513.25  | 2030.30 | 18  | 4 I  | 243.13  | 257.13  | 1015.65 | 19  | 4 I  | 162.42 | 171.75 | 877.44 | 19  |
| 5 L       | 588.34  | 626.33  | 1917.21 | 18  | 5 L  | 299.67  | 313.67  | 959.11  | 18  | 5 L  | 200.12 | 209.45 | 639.74 | 18  |
| 6 A       | 688.37  | 697.37  | 1894.13 | 17  | 6 A  | 335.19  | 349.19  | 902.57  | 17  | 6 A  | 223.89 | 233.13 | 602.05 | 17  |
| 7 L       | 792.46  | 810.45  | 1733.00 | 16  | 7 L  | 391.73  | 405.73  | 857.05  | 16  | 7 L  | 281.49 | 270.82 | 576.37 | 16  |
| 8 P       | 878.51  | 907.51  | 1620.01 | 15  | 8 P  | 440.26  | 454.26  | 810.51  | 15  | 8 P  | 293.84 | 303.17 | 640.67 | 15  |
| 9 L       | 972.60  | 1020.59 | 1522.96 | 14  | 9 L  | 496.80  | 510.80  | 761.86  | 14  | 9 L  | 331.54 | 340.87 | 508.32 | 14  |
| 10 V      | 1091.66 | 1119.66 | 1409.87 | 13  | 10 V | 546.34  | 560.33  | 725.44  | 13  | 10 V | 384.55 | 373.89 | 470.63 | 13  |
| 11 V      | 1190.73 | 1218.73 | 1310.80 | 12  | 11 V | 595.87  | 609.87  | 655.91  | 12  | 11 V | 397.59 | 406.91 | 437.61 | 12  |
| 12 L      | 1302.82 | 1331.81 | 1211.73 | 11  | 12 L | 652.41  | 666.41  | 606.37  | 11  | 12 L | 435.29 | 444.61 | 404.58 | 11  |
| 13 I      | 1416.90 | 1444.89 | 1086.66 | 10  | 13 I | 708.95  | 722.95  | 549.83  | 10  | 13 I | 472.97 | 482.30 | 366.89 | 10  |
| 14 A      | 1487.94 | 1515.93 | 985.57  | 9   | 14 A | 744.47  | 758.47  | 493.29  | 9   | 14 A | 496.65 | 505.98 | 339.19 | 9   |
| 15 S      | 1574.97 | 1602.96 | 914.53  | 8   | 15 S | 787.99  | 801.99  | 457.77  | 8   | 15 S | 525.66 | 534.99 | 305.51 | 8   |
| 16 T      | 1676.02 | 1704.01 | 827.50  | 7   | 16 T | 838.61  | 852.61  | 414.26  | 7   | 16 T | 569.74 | 569.68 | 276.50 | 7   |
| 17 L      | 1789.10 | 1817.10 | 726.45  | 6   | 17 L | 895.05  | 909.05  | 363.73  | 6   | 17 L | 597.04 | 596.97 | 242.82 | 6   |
| 18 V      | 1886.17 | 1915.16 | 613.37  | 5   | 18 V | 944.59  | 958.59  | 307.19  | 5   | 18 V | 630.06 | 639.39 | 205.13 | 5   |
| 19 L      | 2001.25 | 2029.25 | 514.30  | 4   | 19 L | 1001.13 | 1015.13 | 257.85  | 4   | 19 L | 667.76 | 677.09 | 172.80 | 4   |
| 20 S      | 2086.29 | 2115.28 | 401.21  | 3   | 20 S | 1044.65 | 1058.64 | 201.11  | 3   | 20 S | 696.77 | 706.10 | 134.41 | 3   |
| 21 V      | 2187.35 | 2215.35 | 314.15  | 2   | 21 V | 1094.18 | 1108.18 | 157.58  | 2   | 21 V | 729.79 | 739.12 | 105.40 | 2   |
| 22 W      | -       | -       | 215.11  | 1   | 22 W | -       | -       | 109.06  | 1   | 22 W | -      | -      | 72.38  | 1   |

*IRC9*  
id\_3678\_1073\_to\_1391\_frame\_1  
ions 30/126

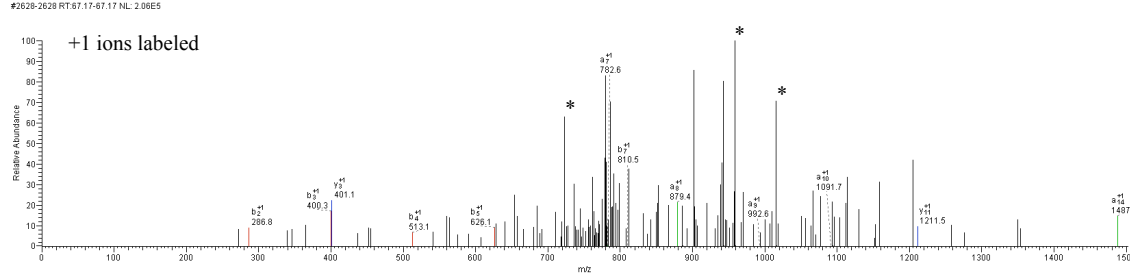

| Charge +1 |         |         |         |     | +2   |        |        |        |     | +3   |        |        |        |     |
|-----------|---------|---------|---------|-----|------|--------|--------|--------|-----|------|--------|--------|--------|-----|
| AA        | A       | B       | Y       | -   | AA   | A      | B      | Y      | -   | AA   | A      | B      | Y      | -   |
| 1 M       | 172.05  | 200.05  |         | -17 | 1 M  | 86.53  | 100.53 |        | -17 | 1 M  | 58.02  | 67.35  |        | -17 |
| 2 W       | 359.13  | 386.13  | 1890.90 | 16  | 2 W  | 179.57 | 193.57 | 925.99 | 16  | 2 W  | 120.05 | 129.38 | 617.66 | 16  |
| 3 I       | 471.22  | 499.21  | 1664.90 | 15  | 3 I  | 236.11 | 250.11 | 832.95 | 15  | 3 I  | 157.74 | 167.08 | 656.64 | 15  |
| 4 V       | 570.28  | 598.28  | 1551.81 | 14  | 4 V  | 285.65 | 299.64 | 776.41 | 14  | 4 V  | 190.77 | 200.10 | 517.94 | 14  |
| 5 V       | 669.35  | 697.35  | 1452.74 | 13  | 5 V  | 335.18 | 349.18 | 726.88 | 13  | 5 V  | 223.79 | 233.12 | 484.92 | 13  |
| 6 T       | 776.40  | 784.40  | 1263.66 | 12  | 6 T  | 385.70 | 399.70 | 677.34 | 12  | 6 T  | 251.47 | 260.80 | 451.92 | 12  |
| 7 V       | 869.47  | 897.46  | 1252.63 | 11  | 7 V  | 435.24 | 449.24 | 626.82 | 11  | 7 V  | 290.49 | 299.83 | 416.21 | 11  |
| 8 F       | 1016.54 | 1044.53 | 1153.56 | 10  | 8 F  | 508.77 | 522.77 | 577.26 | 10  | 8 F  | 339.52 | 348.85 | 365.19 | 10  |
| 9 S       | 1103.57 | 1131.56 | 1005.49 | 9   | 9 S  | 552.29 | 566.29 | 503.75 | 9   | 9 S  | 366.53 | 375.86 | 336.17 | 9   |
| 10 F      | 1250.64 | 1278.63 | 919.46  | 8   | 10 F | 625.82 | 639.82 | 460.23 | 8   | 10 F | 417.55 | 426.88 | 307.16 | 8   |
| 11 P      | 1347.69 | 1375.68 | 772.39  | 7   | 11 P | 674.35 | 688.35 | 366.70 | 7   | 11 P | 449.90 | 459.23 | 258.14 | 7   |
| 12 T      | 1440.74 | 1478.73 | 675.34  | 6   | 12 T | 724.87 | 738.87 | 306.17 | 6   | 12 T | 493.59 | 492.92 | 225.74 | 6   |
| 13 I      | 1561.82 | 1589.82 | 574.20  | 5   | 13 I | 781.41 | 795.41 | 297.65 | 5   | 13 I | 521.28 | 530.61 | 192.10 | 5   |
| 14 P      | 1659.88 | 1687.87 | 461.21  | 4   | 14 P | 829.94 | 843.94 | 231.11 | 4   | 14 P | 553.83 | 562.96 | 164.41 | 4   |
| 15 D      | 1773.90 | 1801.89 | 364.15  | 3   | 15 D | 887.45 | 901.45 | 162.58 | 3   | 15 D | 591.97 | 601.30 | 122.90 | 3   |
| 16 M      | 1904.94 | 1932.94 | 263.12  | 2   | 16 M | 952.97 | 966.97 | 125.07 | 2   | 16 M | 639.85 | 649.18 | 63.71  | 2   |
| 17 V      | -       | -       | 118.09  | 1   | 17 V | -      | -      | 59.55  | 1   | 17 V | -      | -      | 40.03  | 1   |

*BUD16*  
id\_755\_1092\_to\_1143\_frame\_2  
ions 27/96

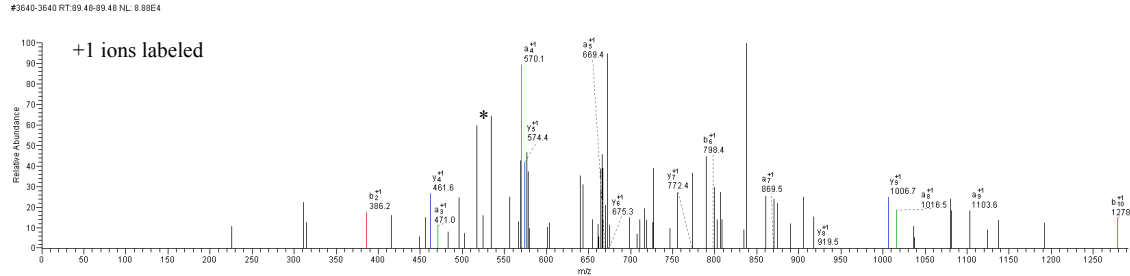

Supplementary Fig. S1.

Sequest-display examples of spectra for matches to downPeptides from our glutaraldehyde-treatment experiments. Matched +1 ion peaks are labeled with designations (a, b and y ions labeled with green, red and blue respectively); matched +2 and +3 ion peaks with relative abundance >50% are labeled with \*. The trypsin peptide sequences are illustrated in the purple boxes. Additional details of the matches are in supplementary file Fournier\_SuppData.xls.

## Acetylated

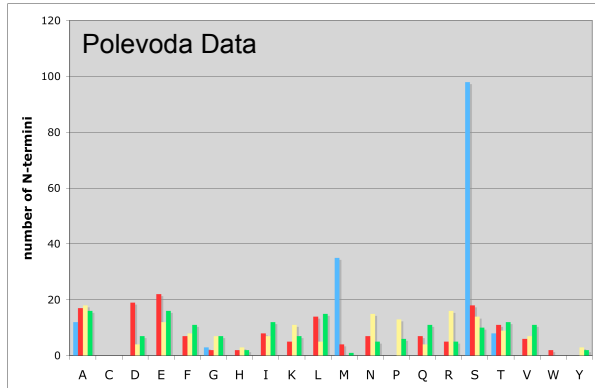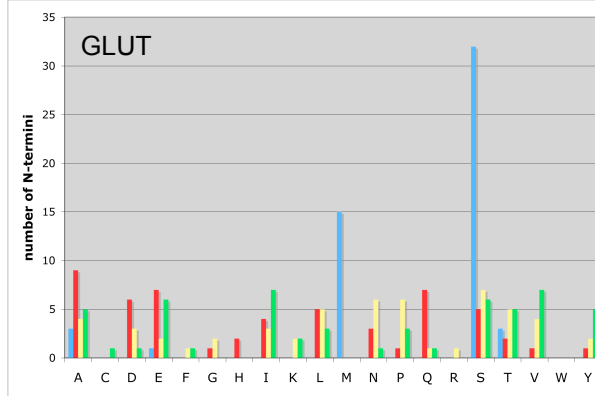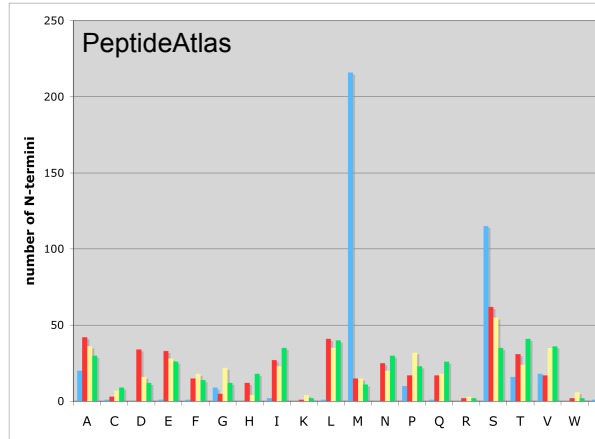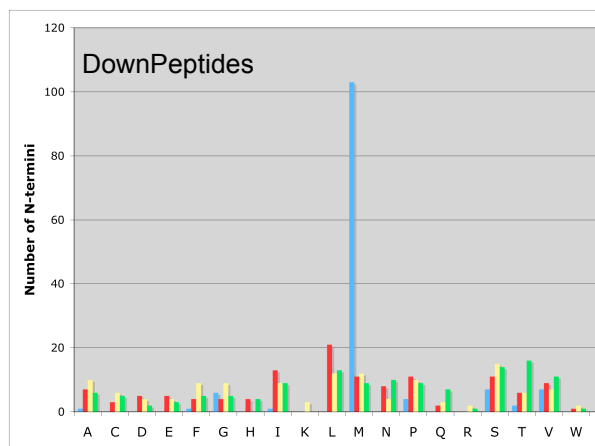

## Not Acetylated

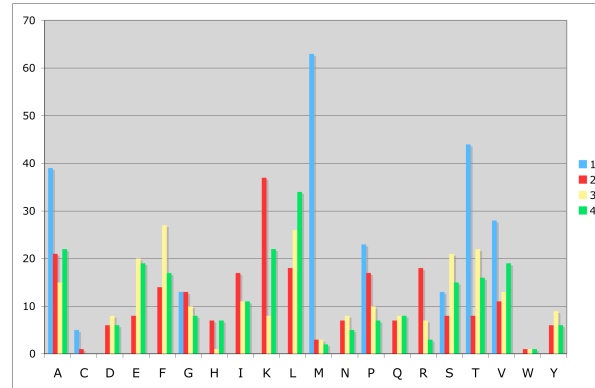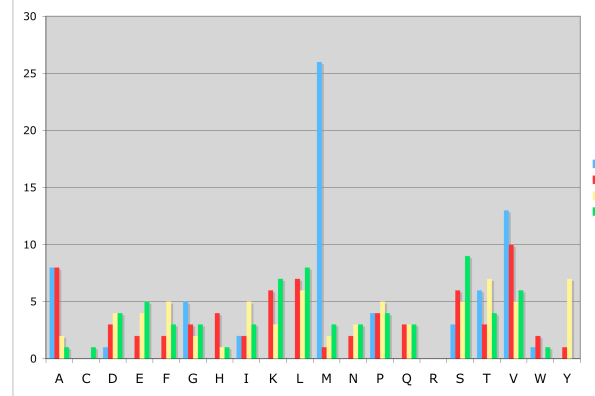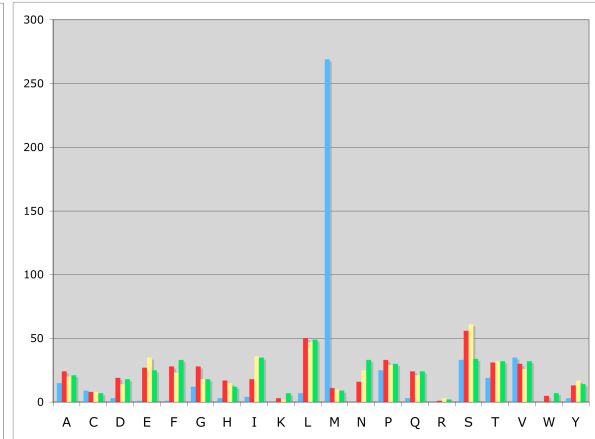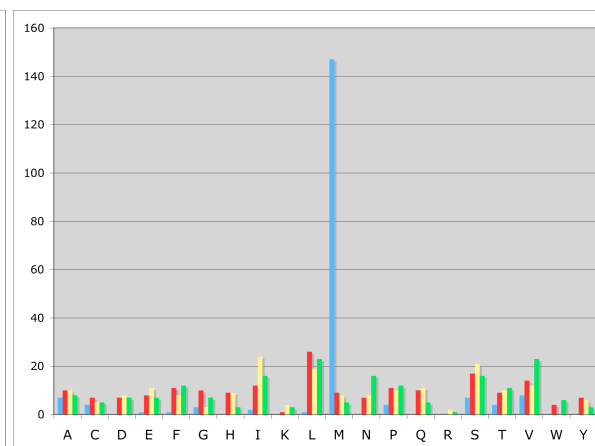



**Supplementary Fig. S2.** Amino acids at positions 1 – 4 of amino peptides. Data from Plevoda and Sherman (15) is compared with amino termini detected in our glutaraldehyde treated cell lysates (GLUT), our screen of Peptide Atlas data, and the amino termini of the proteins initiating at dnAUGs of the downPeptide genes identified in this study.

A

Gene ID 1397

SGD\_Scer\_VHS2/YIL135C 1 MDTSNHNQDHDSDHVAQAQRENDNMYPPSPMSSESSMIFERNVEDPSYLYK 50  
 MIT\_Sbay\_c482\_11869 1 MDTSNNGDHDHPHVAVQTEDDDTYMPPSPMSSESSMIFERNVEDPSYLYK 50  
 MIT\_Smik\_c636\_10468 1 MDTSNNNQDEGTHIATQTEENDNAYMPPSPMSSESSMIFERNVEDPSYLYK 50  
 MIT\_Spar\_c440\_10736 1 MDISNNSQDHGTHEAAQTENDNTYMPPSPMSSESSMIFERNVEDPSYLYK 50  
 Symbols

score = 17 score = 36

Gene ID 846

SGD\_Scer\_ERG28/YER044C 1 MFSLQDVITTTKTTLAAMPKGYLPKWLLFISIVSVFNISIQTYVSGLELTR 50  
 MIT\_Sbay\_c82\_6286 1 MFSLQDVITTTKTTLAAMPNGYLPKWLLFISIVSVFNSVQTYISGLELTR 50  
 MIT\_Smik\_c283\_6042 1 MFSLQDVITTTKTTLAAMPKGYLPKWLLFISIVSVFNISIQTYISGLELTR 50  
 MIT\_Spar\_c424\_6198 1 MFSLQDVITTTKTTLAAMPKGYLPKWLLFISIVSVFNISIQTYVSGLELTR 50  
 Symbols

score = 35 score = 35

Gene ID 237

SGD\_Scer\_EDS1/YBR033W 1 MSHHVPN-LYGTPIRDPHERKRNASAMGEVNSVSSRNCERGSEKGTKQR 49  
 MIT\_Sbay\_c103\_666 1 MSQHTPTNVYDITVPSPIYERPSIVTSMGGANWHETARNCKSDSKKITKQR 50  
 MIT\_Smik\_c146\_1175 1 MPQHVPN-LYGTPIPNQYHGLNIPAPMGEVDKLDSSRICERRGEGVTKQR 49  
 MIT\_Spar\_c197\_1116 1 MPOHVPN-LYGTPIPNQYERTNTSASTGEVNRSDSSRNCKRGSEGSTKQR 49  
 Symbols

score = 23 score = 13

B

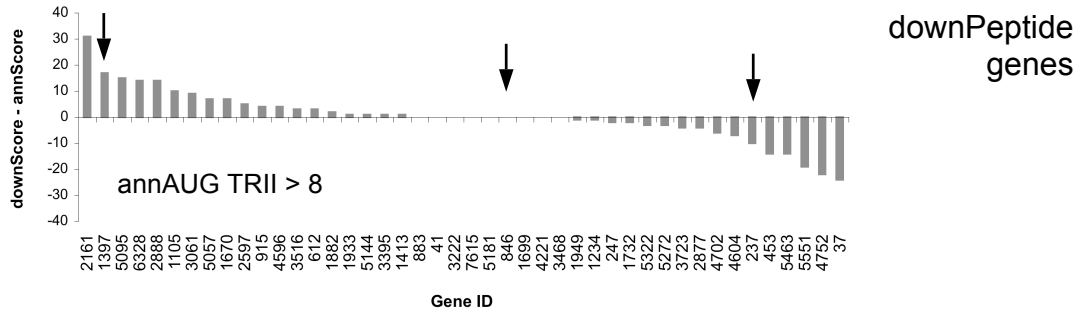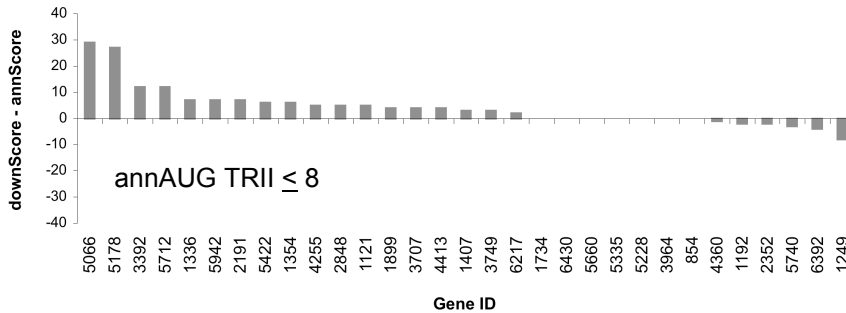

C

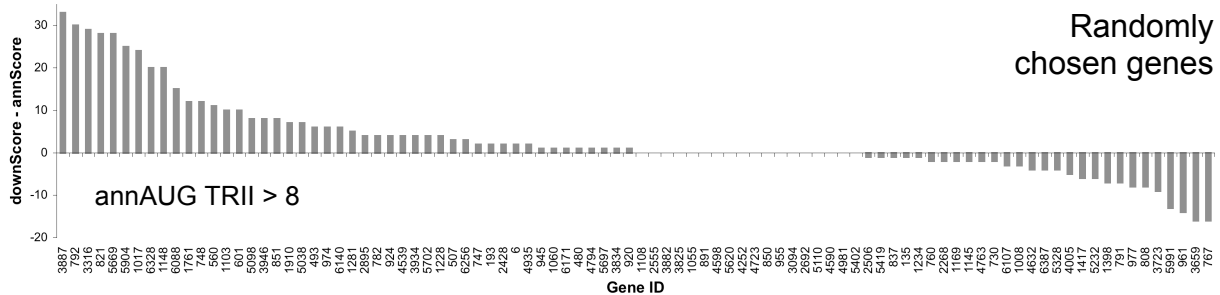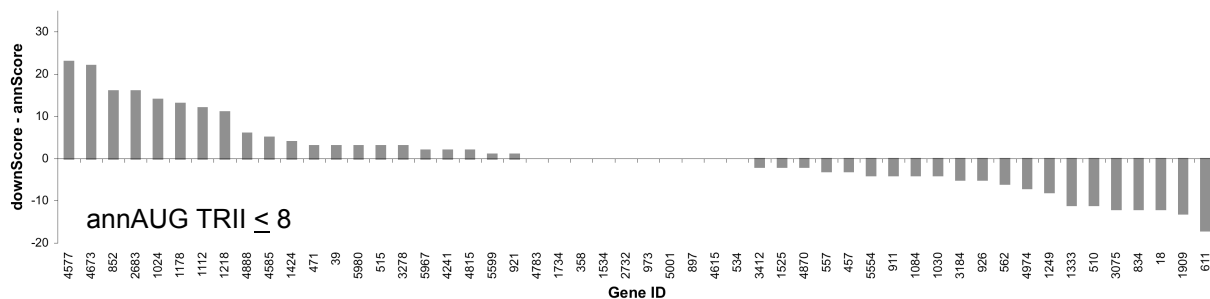

### Supplementary Fig. S3.

Sequence conservation. **(A)** DownPeptide gene protein sequences were aligned with homologs from three other *Saccharomyces* species (<http://www.yeastgenome.org>). Amino acid sequence conservation was compared in the 12 amino acid windows starting at the annAUG and dnAUG (boxed). *VYS2* shows greater conservation at the dnAUG window. *ERG28* has similar conservation at the annAUG and dnAUG windows, whereas *EDSI* has stronger conservation in the annAUG window. **(B)** 75 of the 135 downPeptide genes with frame 1 dnAUGs have homologs reported in the three species and were analyzed here. Unlike controls (see C), downPeptide genes with poor sequence context annAUGs ( $\text{TRII} < 8$ ) have greater conservation at their dnAUG window compared to the annAUG ( $p < 0.036$ , Mann-Whitney U test). Conservation of each amino acid in the 12 amino acid window was scored as identical (3 points = yellow \*), strong similarity (2 points = pink :), or weak similarity (1 point = green .). The sum of scores for the annAUG window was subtracted from the sum for the dnAUG window. The resulting difference scores (DownScore – annScore) are graphed. *VYS2*, *ERG28* and *EDSI* (gene IDs [score] 1397 [9], 846 [0] and 237 [-10], respectively) are marked with arrows. **(c)** Amino acid conservation in randomly selected downORFs. Genes with rank 1, frame 1 dnAUGs located 60 - 100 nt downstream of the annAUG were selected randomly. The genes were divided into two groups based on their annAUG TRII score ( $\leq 8$  and  $> 8$ ). Amino acid sequence conservation was compared in the 12 amino acid windows starting at the annAUG and dnAUG. Unlike downPeptide genes, the annAUG  $\text{TRII} \leq 8$  set did not have elevated conservation at the dnAUG region.

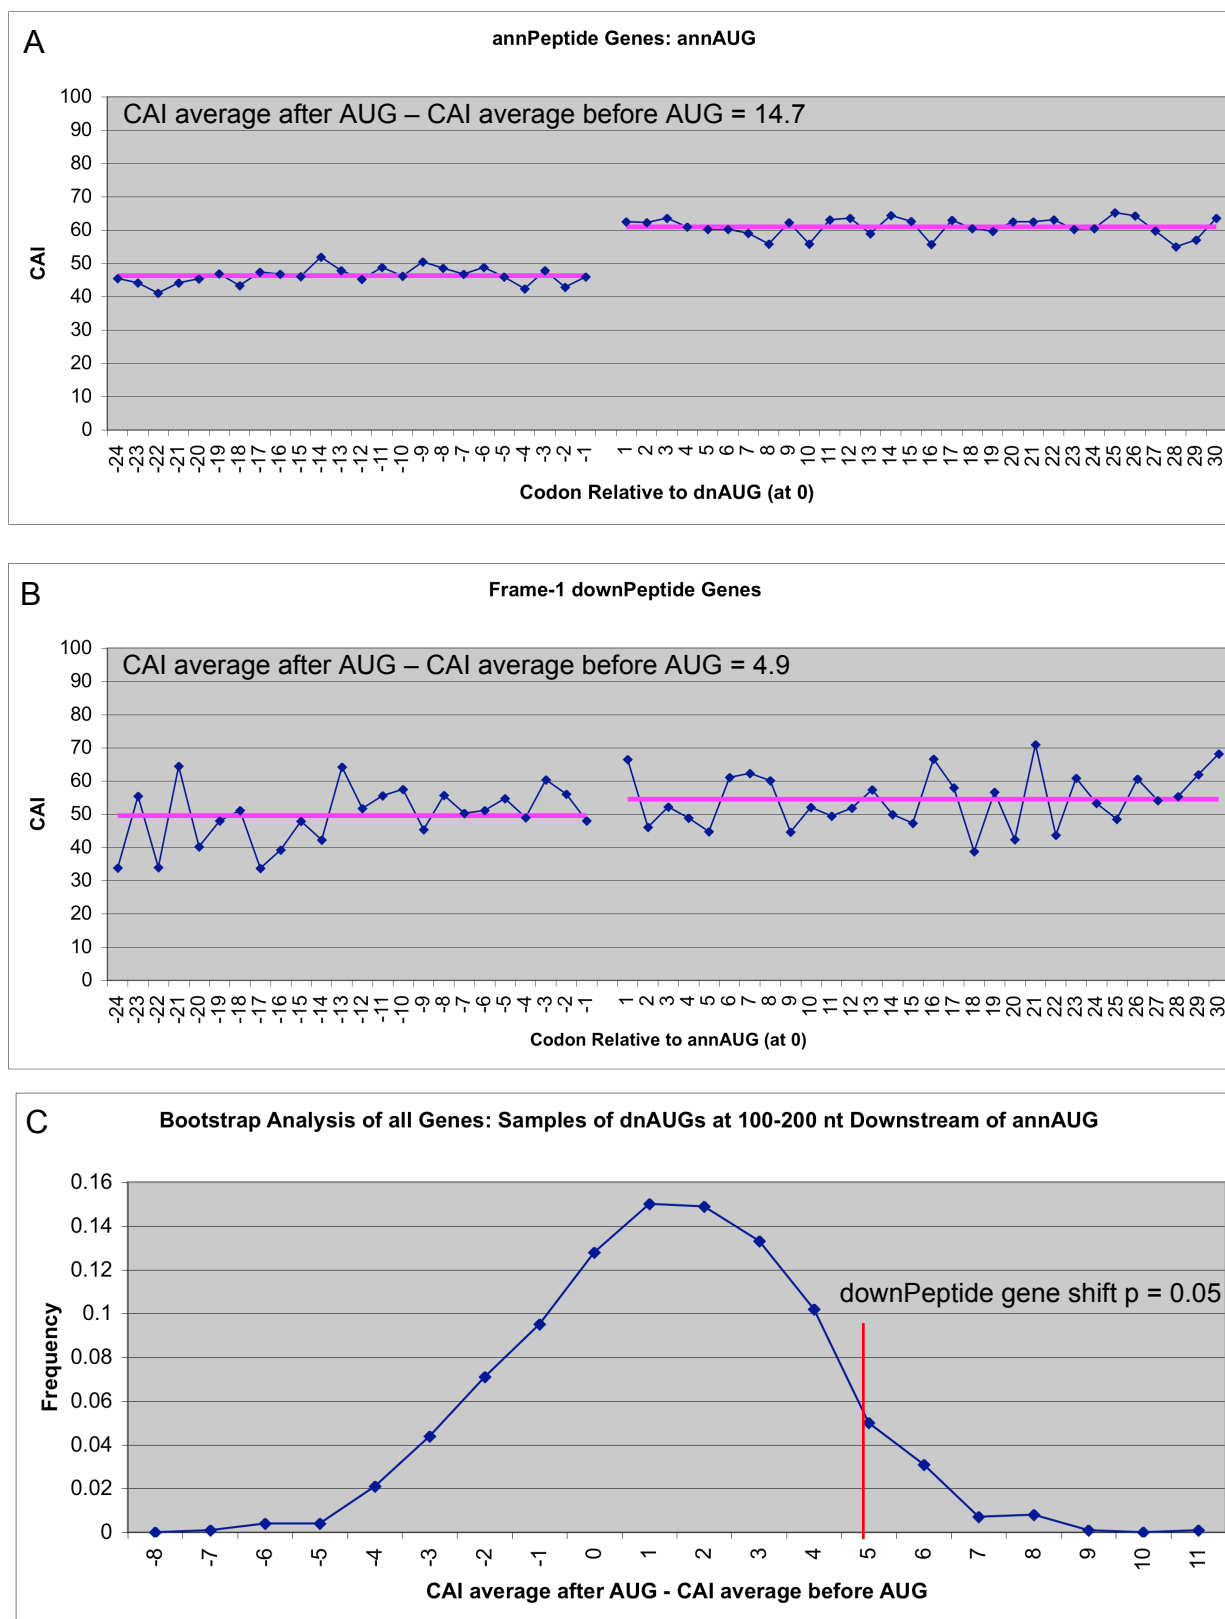

**Supplementary Fig. S4.** (A) Codon bias tests. The average Codon Adaptation Index (CAI percentage) immediately downstream of the annAUG is elevated compared to upstream of the AUG. (B) A significant shift of 4.9 in CAI index is also seen at dnAUGs of frame-1

downPeptide genes ( $p = 0.05$ ). dnAUGs of annPeptide genes do not show a significant increase, as is the case for dnAUGs 100-200 nt or 200-300 nt downstream of annAUGs in all genes (data not shown). Only codons in detected mRNAs are included in this analysis. The mean values before and after the AUG are illustrated in pink (A,B). (C) Bootstrap analysis of dnAUGs sampled with replacement from dnAUGs at 100 – 200 nt downstream of the annAUG; the CAI shift of 4.9% observed in (B) has  $p = 0.05$ . The analysis in (B) is for downPeptide genes conforming to a 1% false identification rate; genes conforming to a 5% rate show a less pronounced CAI shift of 2.3.

The bootstrap analysis was performed as follows: For each downPeptide gene, the sequence flanking a randomly chosen frame 1 dnAUG from a randomly chosen gene was selected such that the length of the upstream sequence was equal to the length between the annAUG and the dnAUG of a frame 1 downPeptide gene, and the downstream sequence (after the dnAUG) was set to a fixed length (30 codons). This was performed for each of the downPeptide genes resulting in a group of 29 sequences which were aligned at their dnAUGs and the average CAI for each position calculated, provided that there are at least 10 sequences extended to that position. The mean CAI upstream of the AUG was subtracted from the mean CAI downstream of the AUG. This was repeated 1000 times to generate a distribution of CAI differences in (C).

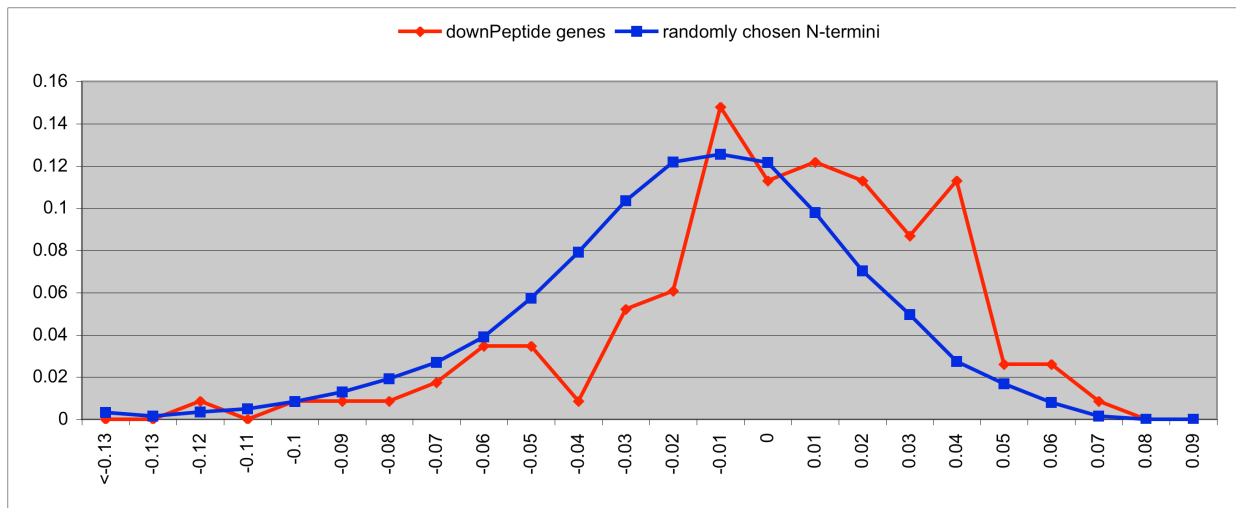

**Supplementary Fig. S5.** Examination of predicted protein disorder for protein sequence between the annAUG and dnAUG of downPeptide genes. For each downPeptide gene, the mean predicted disorder score for amino acids coded between the annAUG and dnAUG was computed using a scoring weight matrix (16) (red curve). For each downPeptide gene, control amino acid sequences of the same length were selected from the annotated amino termini of 500 randomly selected genes (blue). The analysis was limited to downPeptide genes with >5 codons between annAUG and implicated dnAUG. 70 of the 115 downPeptide genes had disorder scores >0 which is significantly higher than the control sequences (chi-square  $p < 0.01$ ), suggesting that the protein segments encoded between the annAUG and dnAUG tend to be disordered.

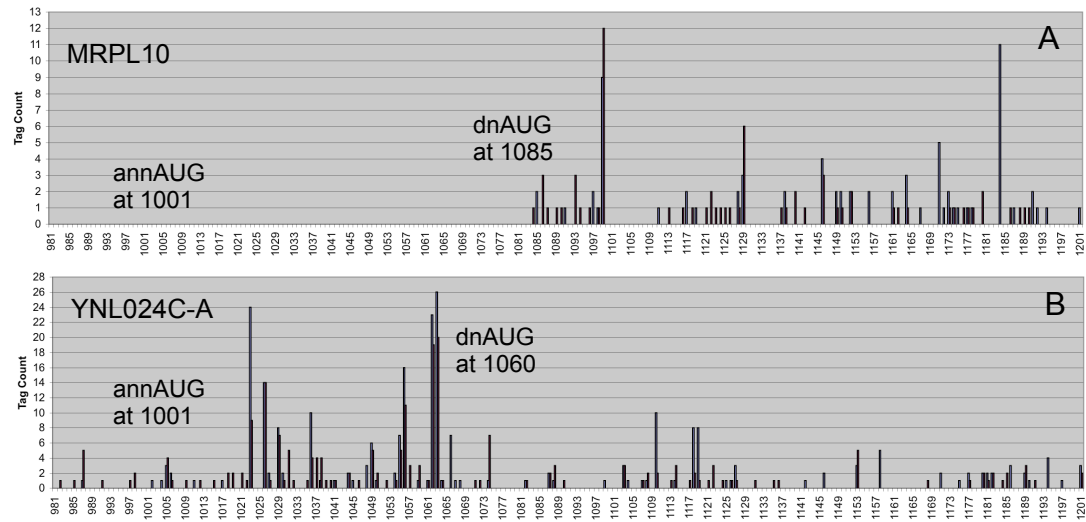

**Supplementary Fig. S6.** Ribosome profiles of individual genes.

(A) DownPeptide gene *MRPL10* had an amino peptide mapping to the dnAUG at coordinate 1085. The ribosome profile for this gene suggests most translation initiation is at the dnAUG. (B) An amino peptide mapped to 1060 in *YNL024C-A*. The gene's ribosome profile suggests translation initiation at this dnAUG as well as the annAUG, although in individual gene profiles, it can be difficult to distinguish initiation from ribosome pausing (17).

## Supplementary Tables

**Supplementary Table S1.** TurboSequest probability thresholds

| <b>sample accession<sup>1</sup></b> | <b>forward peptides<sup>2,4</sup></b> | <b>decoy peptides<sup>2,4</sup></b> | <b>probability threshold<sup>5</sup></b> | <b>PeptideAtlas modifications</b> | <b>additional modifications (this study)</b>                                               |
|-------------------------------------|---------------------------------------|-------------------------------------|------------------------------------------|-----------------------------------|--------------------------------------------------------------------------------------------|
| PAe000079                           | 233                                   | 11                                  | 0.0033                                   | C+9 opt., C+227.13 static         | M+16 opt., N-term+42 opt.                                                                  |
| PAe000084                           | 12097                                 | 589                                 | 0.0810                                   | C+9 opt., C+227.13 static         | M+16 opt., N-term+42 opt.                                                                  |
| PAe000086                           | 13901                                 | 688                                 | 0.1329                                   | C+9 opt., C+227.13 static         | M+16 opt., N-term+42 opt.                                                                  |
| PAe000088                           | 16262                                 | 785                                 | 0.2025                                   | C+9 opt., C+227.13 static         | M+16 opt., N-term+42 opt.                                                                  |
| PAe000089                           | 10239                                 | 505                                 | 0.1125                                   | C+9 opt., C+227.13 static         | M+16 opt., N-term+42 opt.                                                                  |
| PAe000120                           | 1720                                  | 85                                  | 0.4783                                   | none                              | M+16 opt., N-term+42 opt.                                                                  |
| PAe000125                           | 6209                                  | 161                                 | 0.9113                                   | C+57.02 static                    | M+16 opt., N-term+42 opt.                                                                  |
| PAe000141                           | 5549                                  | 274                                 | 0.8100                                   | C+57.02 static                    | M+16 opt., N-term+42 opt.                                                                  |
| PAe000142                           | 1193                                  | 36                                  | 1.000                                    | C+57.02 static                    | M+16 opt., N-term+42 opt.                                                                  |
| PAe000145                           | 7054                                  | 328                                 | 0.0405                                   | C+57.02 static                    | M+16 opt., N-term+42 opt.                                                                  |
| PAe000149                           | 1916                                  | 94                                  | 0.1823                                   | none                              | M+16 opt., N-term+42 opt.                                                                  |
| PAe000151                           | 819                                   | 37                                  | 0.0729                                   | C+8 opt., C+442.2 static          | M+16 opt., N-term+42 opt.                                                                  |
| PAe000158                           | 8641                                  | 432                                 | 0.1640                                   | C+57.02 static                    | M+16 opt., N-term+42 opt.                                                                  |
| PAe000160                           | 4894                                  | 241                                 | 0.1125                                   | C+57.02 static                    | M+16 opt., N-term+42 opt.                                                                  |
| PAe000162                           | 1125                                  | 56                                  | 0.0133                                   | C+57.02 static                    | M+16 opt., N-term+42 opt.                                                                  |
| PAe000164                           | 9552                                  | 467                                 | 0.1125                                   | C+9 opt., C+227.13 static         | M+16 opt., N-term+42 opt.                                                                  |
| PAe000165                           | 10105                                 | 499                                 | 0.1476                                   | C+57.02 static                    | M+16 opt., N-term+42 opt.                                                                  |
| PAe000166                           | 2239                                  | 108                                 | 0.0531                                   | C+57.02 static                    | M+16 opt., N-term+42 opt.                                                                  |
| PAe000167                           | 422                                   | 20                                  | 0.0045                                   | C+57.02 static                    | M+16 opt., N-term+42 opt.                                                                  |
| PAe000324                           | 57583                                 | 2834                                | 0.5314                                   | C+57.02 static                    | M+16 opt., N-term+42 opt.<br>M+16 opt., N-term+68 opt.,<br>K+68 opt., P(N-term)+86<br>opt. |
| ACET                                | 250 <sup>3,4</sup>                    | 12 <sup>3,4</sup>                   | 0.0600                                   | N/A                               | M+16 opt., N-term+42 opt.,<br>K+68 opt., P(N-term)+86<br>opt.                              |
| GLUT                                | 175 <sup>3,4</sup>                    | 9 <sup>3,4</sup>                    | 0.2800                                   | N/A                               |                                                                                            |

<sup>1</sup> <http://www.peptideatlas.org/repository/>

<sup>2</sup> Matches to N-terminal, internal and C-terminal peptides with no internal trypsin sites, and TurboSequest RSp rank = 1

<sup>3</sup> Matches to N-terminal peptides with no internal trypsin sites, and TurboSequest RSp rank = 1

<sup>4</sup> Peptides detected multiple times are counted only once per MS/MS experiment

<sup>5</sup> TurboSequest probability threshold for false identification rate < 5%



**Supplementary Table S2. Gene Status**

| <b>gene status*</b>          | <b>annPeptide<br/>genes</b> | <b>downPeptide<br/>genes</b> | <b>annotated<br/>genes</b> |
|------------------------------|-----------------------------|------------------------------|----------------------------|
| Verified                     | 424                         | 203                          | 4673                       |
| Uncharacterized              | 75                          | 54                           | 1118                       |
| Dubious                      | 50                          | 42                           | 813                        |
| Transposable<br>element gene | 7                           | 0                            | 89                         |
| Pseudogene                   | 2                           | 0                            | 21                         |
| Silenced gene                | 1                           | 0                            | 4                          |

\* <http://www.yeastgenome.org>

**Supplementary Table S3.**

Frequencies of annPeptides and downPeptides detected for the same gene

| <b>gene id</b> | <b>gene name</b> | <b>dnAUG location(s)*</b> | <b>annPeptide count †</b> | <b>downPeptide count †</b> |
|----------------|------------------|---------------------------|---------------------------|----------------------------|
| YDR385W        | EFT2             | 1053, 1064                | 46                        | 1, 13                      |
| YIL053W        | RHR2             | 1053                      | 24                        | 1                          |
| YFR053C        | HXK1             | 1046, 1097                | 22                        | 1, 6                       |
| YKL152C        | GPM1             | 1074                      | 12                        | 1                          |
| YJR024C        | YJR024C          | 1032                      | 8                         | 6                          |
| YLR293C        | GSP1             | 1059                      | 7                         | 1                          |
| YLL041C        | SDH2             | 1055                      | 3                         | 2                          |
| YER044C        | ERG28            | 1052                      | 2                         | 2                          |
| YOL061W        | PRS5             | 1008                      | 2                         | 2                          |
| YLR345W        | YLR345W          | 1007                      | 2                         | 1                          |
| YPR048W        | TAH18            | 1032                      | 2                         | 1                          |
| YBR249C        | ARO4             | 1034                      | 1                         | 3                          |
| YGL255W        | ZRT1             | 1059                      | 1                         | 2                          |
| YLL053C        | YLL053C          | 1095                      | 1                         | 2                          |
| YDL185W        | TFP1             | 1083                      | 1                         | 1                          |
| YEL048C        | YEL048C          | 1074                      | 1                         | 1                          |
| YGL041C        | YGL041C          | 1046                      | 1                         | 1                          |
| YGR097W        | ASK10            | 1049                      | 1                         | 1                          |
| YIL074C        | SER33            | 1013                      | 1                         | 1                          |
| YIL151C        | YIL151C          | 1031                      | 1                         | 1                          |
| YJL171C        | YJL171C          | 1037                      | 1                         | 1                          |
| YJL187C        | SWE1             | 1082                      | 1                         | 1                          |
| YKL209C        | STE6             | 1079                      | 1                         | 1                          |
| YKL216W        | URA1             | 1019                      | 1                         | 1                          |
| YKR024C        | DBP7             | 1028                      | 1                         | 1                          |
| YLR003C        | YLR003C          | 1026                      | 1                         | 1                          |
| YOR200W        | YOR200W          | 1008                      | 1                         | 1                          |
| YOR317W        | FAA1             | 1075                      | 1                         | 1                          |

\* Nucleotide locations of dnAUG compared to annAUG (at 1001, 1002, 1003)

† Number of independent matches to annPeptides and downPeptides in multiple MS/MS experiments. Illustrated are genes with  $\geq 1$  matches to both an annPeptide and downPeptide. For most of these genes, the annPeptides and downPeptides were detected at similar frequencies.

**Supplementary Table S4. Peptide Reading Frames**

| <b>AUG type</b>                 | <b>AUG rank<sup>2</sup></b> | <b>reading frame<sup>1</sup></b> |          |          |
|---------------------------------|-----------------------------|----------------------------------|----------|----------|
|                                 |                             | <b>1</b>                         | <b>2</b> | <b>3</b> |
| AnnPeptides                     | 0                           | 583                              | 0        | 0        |
| Down-<br>Peptides               | 1                           | 60                               | 76       | 20       |
|                                 | 2                           | 41                               | 49       | 9        |
|                                 | 3                           | 17                               | 17       | 2        |
|                                 | 4                           | 12                               | 8        | 1        |
|                                 | 5                           | 1                                | 5        | 0        |
|                                 | >5                          | 1                                | 1        | 0        |
| Annotated<br>Genes <sup>3</sup> | 0                           | 6711                             | 0        | 0        |
|                                 | 1                           | 1356                             | 2511     | 572      |
|                                 | 2                           | 816                              | 1416     | 332      |
|                                 | 3                           | 417                              | 654      | 118      |
|                                 | 4                           | 180                              | 240      | 45       |
|                                 | 5                           | 69                               | 84       | 17       |

<sup>1</sup> Reading frame relative to annotated ORF (frame 1)

<sup>2</sup> The rank indicates the AUG rank relative to the annotated AUG (rank = 0)

<sup>3</sup> All AUGs within 100 nt downstream of the annotated AUG, the region screened by SEQUEST analysis, and encoding a theoretical peptide  $\geq 5$  amino acids

**Supplementary Table 5A.** Ribosome densities of downPeptide genes

| id    | gene name <sup>2</sup> | annORF length | annAUG to dnAUG distance | Ribosome tag counts <sup>1</sup> |                     |                   |
|-------|------------------------|---------------|--------------------------|----------------------------------|---------------------|-------------------|
|       |                        |               |                          | -30 to annAUG-1                  | annAUG to annAUG+30 | dnAUG to dnAUG+30 |
| 28739 | YDR524C-B              | 200           | 70                       | 36                               | 5084                | 5646              |
| 1635  | GPM1                   | 743           | 73                       | 4                                | 3889                | 3871              |
| 2793  | EFT2                   | 2528          | 52                       | 4                                | 1628                | 1660              |
| 2793  | EFT2                   | 2528          | 63                       | 4                                | 1628                | 1172              |
| 2976  | PMA1                   | 2756          | 91                       | 111                              | 1385                | 360               |
| 2344  | TFP1                   | 3215          | 58                       | 0                                | 617                 | 235               |
| 3222  | HXK2                   | 1460          | 45                       | 2                                | 592                 | 258               |
| 7524  | YMR122W-A              | 254           | 73                       | 7                                | 302                 | 109               |
| 1315  | RHR2                   | 752           | 52                       | 11                               | 262                 | 273               |
| 2634  | ADK1                   | 668           | 91                       | 1                                | 244                 | 261               |
| 453   | ARO4                   | 1112          | 33                       | 3                                | 230                 | 70                |
| 3882  | ATP2                   | 1535          | 96                       | 0                                | 219                 | 37                |
| 4284  | GSP1                   | 659           | 58                       | 1                                | 192                 | 163               |
| 4604  | MIC17                  | 470           | 72                       | 3                                | 185                 | 14                |
| 1699  | URA1                   | 944           | 78                       | 8                                | 161                 | 161               |
| 4276  | CTS1                   | 1688          | 55                       | 31                               | 154                 | 147               |
| 4219  | CDC42                  | 575           | 94                       | 0                                | 138                 | 59                |
| 5844  | FAA1                   | 2102          | 74                       | 0                                | 130                 | 19                |
| 1407  | PAN6                   | 929           | 96                       | 0                                | 104                 | 15                |
| 3516  | ERV29                  | 932           | 36                       | 0                                | 89                  | 25                |
| 4359  | RPS22B                 | 392           | 34                       | 0                                | 89                  | 189               |
| 4182  | HCR1                   | 797           | 99                       | 1                                | 74                  | 36                |
| 2391  | OST4                   | 110           | 76                       | 1                                | 73                  | 50                |
| 3367  | PRE9                   | 776           | 91                       | 12                               | 71                  | 82                |
| 5057  | RPC19                  | 428           | 93                       | 0                                | 70                  | 22                |
| 4247  | YLR257W                | 965           | 58                       | 5                                | 67                  | 71                |
| 4511  | GSF2                   | 1211          | 28                       | 1                                | 53                  | 23                |
| 1868  | STE2                   | 1295          | 88                       | 8                                | 47                  | 85                |
| 2534  | ARO1                   | 4766          | 34                       | 0                                | 47                  | 36                |
| 1476  | HYR1                   | 491           | 91                       | 9                                | 46                  | 45                |
| 2418  | SNQ2                   | 4505          | 37                       | 12                               | 46                  | 24                |
| 28698 | YNL024C-A              | 218           | 59                       | 1                                | 46                  | 61                |
| 3545  | CCT8                   | 1706          | 73                       | 0                                | 45                  | 24                |
| 1933  | RSC8                   | 1673          | 33                       | 0                                | 44                  | 29                |
| 1949  | HXK1                   | 1457          | 45                       | 2                                | 41                  | 10                |
| 1692  | STE6                   | 3872          | 81                       | 0                                | 38                  | 22                |
| 2264  | PHO2                   | 1679          | 70                       | 0                                | 37                  | 13                |
| 2560  | ENT5                   | 1235          | 40                       | 0                                | 37                  | 20                |
| 2161  | MCD1                   | 1700          | 87                       | 2                                | 36                  | 13                |
| 2864  | NHX1                   | 1901          | 76                       | 0                                | 33                  | 13                |
| 3427  | SKI6                   | 740           | 43                       | 4                                | 33                  | 38                |
| 517   | GBP2                   | 1283          | 91                       | 3                                | 30                  | 23                |
| 3492  | TNA1                   | 1604          | 46                       | 0                                | 29                  | 51                |
| 3492  | TNA1                   | 1604          | 43                       | 0                                | 29                  | 45                |
| 4596  | RSC9                   | 1745          | 81                       | 0                                | 29                  | 16                |
| 2939  | YDR531W                | 1103          | 40                       | 0                                | 28                  | 29                |
| 113   | PEP1                   | 4739          | 58                       | 12                               | 27                  | 25                |
| 1778  | YKR070W                | 1058          | 61                       | 0                                | 27                  | 18                |

|      |           |      |    |   |    |    |
|------|-----------|------|----|---|----|----|
| 846  | ERG28     | 446  | 51 | 4 | 25 | 11 |
| 486  | MRPL27    | 440  | 43 | 0 | 24 | 16 |
| 1734 | GCN3      | 917  | 63 | 2 | 24 | 52 |
| 680  | TUP1      | 2141 | 37 | 8 | 23 | 40 |
| 2352 | NUS1      | 1127 | 76 | 1 | 20 | 11 |
| 3171 | KEX1      | 2189 | 97 | 0 | 19 | 12 |
| 5212 | LYP1      | 1835 | 72 | 0 | 17 | 22 |
| 2597 | SLY1      | 2000 | 48 | 3 | 16 | 19 |
| 7615 | YKL018C-A | 299  | 78 | 0 | 16 | 11 |
| 2553 | SWI5      | 2129 | 82 | 0 | 15 | 10 |
| 4221 | BNA5      | 1361 | 78 | 0 | 14 | 18 |
| 5931 | RET3      | 569  | 67 | 0 | 14 | 75 |
| 1597 | APN1      | 1103 | 97 | 0 | 13 | 10 |
| 3379 | NAT2      | 866  | 53 | 0 | 12 | 12 |
| 3785 | YJR024C   | 734  | 31 | 0 | 12 | 19 |
| 5095 | RPC31     | 755  | 45 | 2 | 12 | 33 |
| 774  | YEL048C   | 458  | 94 | 0 | 11 | 11 |
| 6392 | MLC2      | 491  | 75 | 0 | 11 | 24 |
| 6430 | MRP10     | 287  | 99 | 1 | 10 | 23 |
| 1234 | CTF8      | 401  | 87 | 1 | 9  | 11 |
| 3707 | YJL171C   | 1190 | 30 | 0 | 9  | 20 |
| 5144 | YNL200C   | 740  | 57 | 0 | 8  | 16 |
| 5052 | YNL108C   | 812  | 31 | 0 | 7  | 24 |
| 4694 | VBA1      | 1688 | 79 | 4 | 5  | 10 |
| 5411 | GAL11     | 3245 | 84 | 0 | 5  | 15 |
| 1336 | SER33     | 1409 | 48 | 0 | 4  | 39 |
| 1389 | YIL127C   | 620  | 52 | 0 | 4  | 13 |
| 2818 | STE14     | 719  | 28 | 0 | 4  | 11 |
| 3411 | OKP1      | 1220 | 55 | 0 | 3  | 11 |
| 6283 | MRL1      | 1145 | 67 | 1 | 3  | 16 |
| 3268 | CAX4      | 719  | 37 | 0 | 1  | 21 |
| 5066 | YNL122C   | 345  | 51 | 0 | 0  | 26 |
| 5228 | MRPL10    | 966  | 84 | 0 | 0  | 14 |

<sup>1</sup> Ribosome tag densities were compared in three 30-nt windows (i) starting 30 nt upstream of the annAUG, (ii) at the annAUG, and (iii) at the dnAUG. The tags in the dnAUG window are likely due to ribosomes that initiated translation at the dnAUG or, in some cases, the annAUG.

<sup>2</sup> We analyzed 81 of the 320 downPeptide genes with the following properties: (i)  $> 0.1$  tags/nt in the first 200 nt of their annotated ORF, (ii)  $ORF \geq 200$ , (iii)  $\geq 10$  tags/30 nt in the 30-nt window starting at the implicated dnAUG, and (iv) annAUG to dnAUG distance  $\geq 30$ . Almost all of these genes have ribosome tags in the window starting at the annAUG, consistent with translation initiation at the annAUG as well as the dnAUG initiation implicated by our MS/MS analysis; only five of these genes have  $\leq 3$  tags in this window, a density similar to background levels in the 30-nt window upstream of the annAUG.

**Supplementary Table S6.** DownPeptide genes with truncated 5'UTRs

| <b>id<sup>1</sup></b> | <b>gene id</b> | <b>gene name</b> | <b>max 5'UTR</b> | <b>min 5'UTR</b> | <b>5' cap closest to dnAUG<sup>2</sup></b> | <b>dnAUG location<sup>3</sup></b> | <b>dnAUG frame</b> |
|-----------------------|----------------|------------------|------------------|------------------|--------------------------------------------|-----------------------------------|--------------------|
| 48                    | YAL051W        | OAF1             | 8                | 8                | 8                                          | 1032                              | 2                  |
| 48                    | YAL051W        | OAF1             | 8                | 8                | 8                                          | 1044                              | 2                  |
| 769                   | YEL043W        | YEL043W          | 8                | 8                | 8                                          | 1033                              | 3                  |
| 774                   | YEL048C        | YEL048C          | 21               | 16               | 16                                         | 1095                              | 2                  |
| 846                   | YER044C        | ERG28            | 83               | 8                | 8                                          | 1052                              | 1                  |
| 1105                  | YHR063C        | PAN5             | 43               | 18               | 18                                         | 1049                              | 1                  |
| 1234                  | YHR191C        | CTF8             | 42               | -3               | -3                                         | 1088                              | 1                  |
| 1241                  | YHR198C        | YHR198C          | -17              | -17              | -17                                        | 1057                              | 3                  |
| 1304                  | YIL042C        | PKP1             | 8                | 8                | 8                                          | 1021                              | 3                  |
| 1304                  | YIL042C        | PKP1             | 8                | 8                | 8                                          | 1027                              | 3                  |
| 1315                  | YIL053W        | RHR2             | 51               | 13               | 13                                         | 1053                              | 2                  |
| 1401                  | YIL139C        | REV7             | 342              | -78              | -47                                        | 1074                              | 2                  |
| 1447                  | YIR008C        | PRI1             | 14               | 14               | 14                                         | 1023                              | 2                  |
| 1635                  | YKL152C        | GPM1             | 46               | 11               | 11                                         | 1074                              | 2                  |
| 1778                  | YKR070W        | YKR070W          | 69               | -38              | -38                                        | 1062                              | 2                  |
| 2391                  | YDL232W        | OST4             | 52               | 9                | 9                                          | 1077                              | 2                  |
| 2671                  | YDR263C        | DIN7             | 139              | 3                | 3                                          | 1067                              | 1                  |
| 2887                  | YDR479C        | PEX29            | 90               | -9               | -9                                         | 1029                              | 2                  |
| 3268                  | YGR036C        | CAX4             | 178              | -16              | -16                                        | 1038                              | 2                  |
| 3492                  | YGR260W        | TNA1             | -3               | -3               | -3                                         | 1044                              | 2                  |
| 3492                  | YGR260W        | TNA1             | -3               | -3               | -3                                         | 1047                              | 2                  |
| 3725                  | YJL189W        | RPL39            | 43               | 14               | 14                                         | 1075                              | 3                  |
| 3964                  | YLL041C        | SDH2             | 66               | 16               | 16                                         | 1055                              | 1                  |
| 3993                  | YLR003C        | YLR003C          | 38               | 18               | 18                                         | 1026                              | 2                  |
| 4105                  | YLR115W        | CFT2             | 10               | 10               | 10                                         | 1026                              | 2                  |
| 4255                  | YLR265C        | NEJ1             | 3                | 3                | 3                                          | 1097                              | 1                  |
| 4299                  | YLR308W        | CDA2             | 111              | 16               | 16                                         | 1033                              | 3                  |
| 4360                  | YLR368W        | MDM30            | 6                | 6                | 6                                          | 1025                              | 1                  |
| 4449                  | YLR457C        | NBP1             | 38               | -15              | -15                                        | 1050                              | 2                  |
| 4702                  | YMR096W        | SNZ1             | 220              | -565             | -3                                         | 1064                              | 1                  |
| 4763                  | YMR154C        | RIM13            | 21               | 19               | 19                                         | 1005                              | 2                  |
| 4793                  | YMR181C        | YMR181C          | 197              | -660             | -61                                        | 1071                              | 2                  |
| 4849                  | YMR236W        | TAF9             | 20               | 16               | 16                                         | 1095                              | 2                  |
| 5057                  | YNL113W        | RPC19            | 9                | 6                | 6                                          | 1094                              | 1                  |
| 5178                  | YNL234W        | YNL234W          | 53               | -58              | -58                                        | 1082                              | 1                  |
| 5178                  | YNL234W        | YNL234W          | 53               | -58              | -58                                        | 1085                              | 1                  |
| 5212                  | YNL268W        | LYP1             | 350              | -7               | -7                                         | 1073                              | 1                  |
| 5228                  | YNL284C        | MRPL10           | -42              | -1056            | -42                                        | 1085                              | 1                  |
| 5434                  | YOL073C        | YOL073C          | 28               | 12               | 12                                         | 1034                              | 1                  |
| 5489                  | YOL129W        | VPS68            | 48               | -9               | -9                                         | 1017                              | 2                  |
| 5551                  | YOR025W        | HST3             | 70               | 15               | 15                                         | 1046                              | 1                  |
| 5931                  | YPL010W        | RET3             | 83               | -29              | -29                                        | 1068                              | 2                  |
| 5957                  | YPL036W        | PMA2             | 556              | -9               | -9                                         | 1071                              | 2                  |

|       |           |           |     |     |     |      |   |
|-------|-----------|-----------|-----|-----|-----|------|---|
| 6041  | YPL120W   | VPS30     | 16  | 16  | 16  | 1015 | 3 |
| 6286  | YPR082C   | DIB1      | 26  | -31 | -31 | 1036 | 3 |
| 6392  | YPR188C   | MLC2      | 35  | 4   | 4   | 1076 | 1 |
| 6430  | YDL045W-A | MRP10     | 54  | -3  | -3  | 1100 | 1 |
| 6432  | YIL009C-A | EST3      | 37  | -3  | -3  | 1095 | 2 |
| 7524  | YMR122W-A | YMR122W-A | 48  | 19  | 19  | 1074 | 2 |
| 28508 | YCL005W-A | VMA9      | 25  | 10  | 10  | 1049 | 1 |
| 28708 | YOL085W-A | YOL085W-A | -65 | -65 | -65 | 1097 | 1 |
| 28736 | YBR056W-A | YBR056W-A | 44  | 14  | 14  | 1092 | 2 |
| 28739 | YDR524C-B | YDR524C-B | 78  | 1   | 1   | 1071 | 2 |

<sup>1</sup> All genes with truncated 5'UTRs where the 5' cap is within 20 nt upstream of the annAUG or between the annAUG and implicated dnAUG. Based on datasets of Miura et al. (18) and Nagalakshmi et al. (19).

<sup>2</sup> 5' cap notated relative to annAUG; caps downstream of the annAUG have negative values

<sup>3</sup> dnAUG location where annAUG is at 1001

### Supplementary Table S7A.

Frame 1 DownPeptide genes with predicted signal sequences between annAUG and dnAUG

| id    | gene name | len | sequence                                                    | type           | prob  | cleavage prob | cleavage location |
|-------|-----------|-----|-------------------------------------------------------------|----------------|-------|---------------|-------------------|
| 92    | YAR069C   | 36  | MEDHTLVAVIVFFGNG <b>E</b> PFHVLSVE <b>M</b> VFVLLSST        | Signal peptide | 0.569 | 0.325         | 16-17             |
| 846   | ERG28     | 27  | MFSLQDVITTTKTTLAA <b>M</b> PKGYLPKWL                        | Non-secretory  | -     | 0.005         | 16-17             |
| 915   | YER113C   | 22  | MRVRPKRSVITL <b>M</b> AIVVVMLIL                             | Signal anchor  | 0.992 | 0.000         | -                 |
| 1105  | PAN5      | 26  | MTAPHRSTIHILGLGA <b>M</b> GTVLAVDLL                         | Signal anchor  | 0.684 | 0.052         | 18-19             |
| 1121  | IRE1      | 17  | MRLLRN <b>M</b> LVLTLLVCV                                   | Non-secretory  | -     | 0.000         | -                 |
| 1478  | YPS6      | 23  | MLISILSLLSSL <b>M</b> CSLTVLGSS                             | Signal peptide | 0.958 | 0.523         | 15-16             |
| 1670  | YKL187C   | 35  | MRIEKHRTPLSKGIWILSVCLLF <b>M</b> FTTLIVIV                   | Signal anchor  | 1.000 | 0.000         | -                 |
| 1699  | URA1      | 36  | MTASLTTKFLNNTYENPFMNASGVHC <b>M</b> TTQELDELA               | Non-secretory  | -     | 0.000         | -                 |
| 1781  | YKR073C   | 36  | MIVFDVSLMIIIFSAFNMSQS <b>N</b> IL <b>M</b> LYNSPHLV         | Signal peptide | 0.803 | 0.549         | 23-24             |
| 3468  | SPG1      | 33  | MKLDSGIYSEAQRVVRTPKFRYI <b>M</b> LGLVGAADV                  | Non-secretory  | -     | 0.000         | -                 |
| 3603  | YJL067W   | 30  | MSKKRKRKYVLIVFNTHHF <b>M</b> LHLGTGLG                       | Non-secretory  | -     | 0.013         | 25-26             |
| 3707  | YJL171C   | 20  | MLQSIVLSVCMF <b>M</b> LHTVAAS                               | Non-secretory  | -     | 0.002         | 14-15             |
| 3822  | YJR061W   | 19  | MMLSLRRFS <b>M</b> YVLRSLRLH                                | Non-secretory  | -     | 0.000         | -                 |
| 3964  | SDH2      | 28  | MLNVLLRRKAFCLVTKKG <b>M</b> ATATTAAT                        | Non-secretory  | -     | 0.004         | 22-23             |
| 3976  | YLL053C   | 19  | MWFPQIAG <b>M</b> AAGGAASAM                                 | Non-secretory  | -     | 0.003         | 13-14             |
| 4702  | SNZ1      | 31  | MTGEDFKIKSGLAQMKGVI <b>M</b> DVVTPEQAK                      | Non-secretory  | -     | 0.000         | -                 |
| 5118  | YNL174W   | 26  | MALEFLAATRGMDNLV <b>M</b> SCSVTLIFS                         | Non-secretory  | -     | 0.007         | 18-19             |
| 5181  | YTP1      | 42  | MTAANKNIVFGFSRSISAILLICFFFEKVC <b>G</b> D <b>M</b> EHDMGDDT | Signal peptide | 0.927 | 0.914         | 31-32             |
| 5272  | MDJ2      | 22  | MVLPPIIGLGT <b>M</b> VALSVKSGL                              | Non-secretory  | -     | 0.156         | 15-16             |
| 5740  | YOR214C   | 24  | MLGLYLSSLFFAFF <b>M</b> AQVFATKYS                           | Signal peptide | 0.591 | 0.552         | 16-17             |
| 6350  | YPR146C   | 16  | MQNMLS <b>M</b> HFFSVMASL                                   | Non-secretory  | -     | 0.000         | -                 |
| 6430  | MRP10     | 43  | MSGKPPVYRLPPLPRLKVKKPIIRQEANKCLVL<br><b>M</b> SNLLQCWSS     | Non-secretory  | -     | 0.000         | -                 |
| 7615  | YKL018C-A | 36  | MLGMIRWVVEGTLVAMLLSA <b>I</b> RRETG <b>M</b> IFFYNQYQL      | Non-secretory  | -     | 0.147         | 20-21             |
| 28508 | VMA9      | 26  | MSSFYTVVGVFIVVSA <b>M</b> SVLFWIMAP                         | Signal anchor  | 0.853 | 0.072         | 16-17             |
| 28769 | YGL006W-A | 26  | MLIFIIHYHRHLALHL <b>M</b> GAFQKHSNS                         | Non-secretory  | -     | 0.001         | 19-20             |



### Supplementary Table S7B.

| id    | gene name | cell_loc | RC | mTP   | SP    | other |
|-------|-----------|----------|----|-------|-------|-------|
| 92    | YAR069C   | -        | 4  | 0.021 | 0.408 | 0.659 |
| 846   | ERG28     | -        | 1  | 0.096 | 0.062 | 0.903 |
| 915   | YER113C   | S        | 4  | 0.234 | 0.627 | 0.073 |
| 1105  | PAN5      | -        | 5  | 0.191 | 0.327 | 0.375 |
| 1121  | IRE1      | -        | 5  | 0.312 | 0.158 | 0.347 |
| 1478  | YPS6      | S        | 2  | 0.061 | 0.849 | 0.162 |
| 1670  | YKL187C   | S        | 2  | 0.025 | 0.878 | 0.134 |
| 1699  | URA1      | -        | 2  | 0.104 | 0.052 | 0.9   |
| 1781  | YKR073C   | S        | 1  | 0.017 | 0.951 | 0.073 |
| 3468  | SPG1      | -        | 3  | 0.193 | 0.075 | 0.713 |
| 3603  | YJL067W   | M        | 5  | 0.352 | 0.346 | 0.095 |
| 3707  | YJL171C   | S        | 4  | 0.061 | 0.669 | 0.382 |
| 3822  | YJR061W   | M        | 5  | 0.539 | 0.029 | 0.5   |
| 3964  | SDH2      | M        | 4  | 0.597 | 0.052 | 0.353 |
| 3976  | YLL053C   | -        | 2  | 0.128 | 0.083 | 0.827 |
| 4702  | SNZ1      | -        | 1  | 0.059 | 0.087 | 0.924 |
| 5118  | YNL174W   | -        | 2  | 0.114 | 0.087 | 0.872 |
| 5181  | YTP1      | S        | 4  | 0.133 | 0.514 | 0.188 |
| 5272  | MDJ2      | S        | 5  | 0.086 | 0.587 | 0.45  |
| 5740  | YOR214C   | S        | 2  | 0.062 | 0.864 | 0.145 |
| 6350  | YPR146C   | -        | 3  | 0.234 | 0.045 | 0.775 |
| 6430  | MRP10     | -        | 4  | 0.374 | 0.067 | 0.664 |
| 7615  | YKL018C-A | S        | 2  | 0.06  | 0.829 | 0.104 |
| 28508 | VMA9      | S        | 1  | 0.039 | 0.91  | 0.103 |
| 28769 | YGL006W-A | -        | 5  | 0.249 | 0.217 | 0.439 |

25 of 152 Frame 1 downPeptide genes have predicted signal sequences (SignalP (20)) between their annAUG and dnAUG (corresponding methionines in red).

The first amino acid after predicted signal peptide cleavage sites are indicated in large bold (5 proteins).

In many cases, no cleavage site is predicted, suggesting the annPeptide protein may be anchored to the ER membrane, whereas the downPeptide protein would not enter the ER.

Part B illustrates cellular localizations predicted by SignalP; M: mitochondria; S: secretory.

**Supplementary Table S8.** Motif Predictions for Frame 1 downPeptide Genes.

| gene name | id   | sequence                                                    | motif detected by InterProScan                                       | statistical signif. | algorithm   |
|-----------|------|-------------------------------------------------------------|----------------------------------------------------------------------|---------------------|-------------|
| ERG28     | 846  | <u>MFSLQDVITTTKTLAA</u> <u>MPKGYLPKWL</u>                   | Family Not Named                                                     | 3.10E-07            | HMMPanther  |
| PAN5      | 1105 | <u>MTAPHRSTIHILGLGA</u> <u>MGTVLAVDLL</u>                   | Signal Peptide                                                       | NA                  | SignalPHMM  |
| IRE1      | 1121 | <u>MRLLRN</u> <u>MLVLTLLVCV</u>                             | Signal Peptide                                                       | NA                  | SignalPHMM  |
| SER33     | 1336 | <u>MSYSAADNLQDSFQRA</u> <u>MNFSGSPGAV</u>                   | D-3-phosphoglycerate dehydrogenase                                   | 6.90E-05            | HMMPanther  |
|           |      | <u>MSYSAADNLQDSFQRA</u> <u>MNFSGSPGAV</u>                   | 2-hydroxyacid dehydrogenase-related                                  | 6.90E-05            | HMMPanther  |
| PAN6      | 1407 | <u>MKIFHTVEEVQWRTQELRETRFRETIGFVPT</u> <u>MGCLHSGHAS</u>    | Pantoate_ligase                                                      | 1.60E-12            | HMMPfam     |
|           |      | <u>MKIFHTVEEVQWRTQELRETRFRETIGFVPT</u> <u>MGCLHSGHAS</u>    | Nucleotidyl transferase Rossmann-like alpha/beta/alpha sandwich fold | 3.70E-07            | superfamily |
|           |      | <u>MKIFHTVEEVQWRTQELRETRFRETIGFVPT</u> <u>MGCLHSGHAS</u>    |                                                                      | 3.80E-08            | Gene3D      |
| YPS6      | 1478 | <u>MLISLISLLSSL</u> <u>MCSLTVLGSS</u>                       | Signal Peptide                                                       | NA                  | SignalPHMM  |
| YKL187C   | 1670 | <u>MRIEKHRTPLSKGIWITLSVCLLF</u> <u>MFTTLILVIV</u>           | Signal Peptide                                                       | NA                  | SignalPHMM  |
|           |      | <u>MRIEKHRTPLSKGIWITLSVCLLF</u> <u>MFTTLILVIV</u>           | transmembrane_regions                                                | NA                  | TMHMM       |
| URA1      | 1699 | <u>MTASLTTKFLNNTYENPFMNASGVHC</u> <u>MTTQELDELA</u>         | dihydroorotate dehydrogenase                                         | 1.90E-18            | HMMPanther  |
|           |      | <u>MTASLTTKFLNNTYENPFMNASGVHC</u> <u>MTTQELDELA</u>         | Dihydroorotate dehydrogenase, class 1/ 2                             | 3.90E-06            | HMMPfam     |
| YKR073C   | 1781 | <u>MIVFDVSLMIIFSFANMSQSNIL</u> <u>MLYNPHVLV</u>             | Signal Peptide                                                       | NA                  | SignalPHMM  |
|           |      | <u>MIVFDVSLMIIFSFANMSQSNIL</u> <u>MLYNPHVLV</u>             | transmembrane_regions                                                | NA                  | TMHMM       |
| MCD1      | 2161 | <u>MVTENPQRLTVLRLATNKGPLAQIWLASN</u> <u>MSNIPRGSVI</u>      | sister chromatid cohesion protein 1                                  | 1.00E-12            | HMMPanther  |
| DIN7      | 2671 | <u>MGIPGLLPQLKRIQKQVSLKKY</u> <u>MYQTLAIDGY</u>             | xpg_n                                                                | 3.70E-06            | HMMPfam     |
|           |      | <u>MGIPGLLPQLKRIQKQVSLKKY</u> <u>MYQTLAIDGY</u>             | exonuclease 1                                                        | 1.70E-07            | HMMPanther  |
| EFT2      | 2793 | <u>MVAFTVDQMRSLMDKVTNVRN</u> <u>MSVIAHVDHG</u>              | eukaryotic translation elongation factor 2                           | 2.00E-09            | HMMPanther  |
|           |      | <u>MVAFTVDQMRSLMDKVTNVRN</u> <u>MSVIAHVDHG</u>              | P-loop containing nucleoside triphosphate hydrolases                 | 3.10E-06            | superfamily |
| SPG1      | 3468 | <u>MKLDSEIYSEAQRVVRTPKFRI</u> <u>MLGLVGAADV</u>             | Signal Peptide                                                       | NA                  | SignalPHMM  |
| YJL067W   | 3603 | <u>MSKKRKRKYLVIVFNTHHF</u> <u>MLHLGTGTLG</u>                | Signal Peptide                                                       | NA                  | SignalPHMM  |
| YJL171C   | 3707 | <u>MLQSIIVSVCMF</u> <u>MLHTVAAS</u>                         | Signal Peptide                                                       | NA                  | SignalPHMM  |
| YJR061W   | 3822 | <u>MMLSLRRFS</u> <u>MYVLRSLRLH</u>                          | Signal Peptide                                                       | NA                  | SignalPHMM  |
| SDH2      | 3964 | <u>MLNVLLRRKAFCLVTKKG</u> <u>MATATTAAT</u>                  | Signal Peptide                                                       | NA                  | SignalPHMM  |
| YLL053C   | 3976 | <u>MWFPPQIAG</u> <u>MAAGGAASAM</u>                          | Signal Peptide                                                       | NA                  | SignalPHMM  |
|           |      | <u>MSWDDEAINGSMGNDDAVLMSWDAAEIGDDEPV</u>                    | Translation initiation factor eIF3 subunit                           | 1.80E-07            | HMMPfam     |
| HCR1      | 4182 | <u>MQSWDAEEEE</u>                                           |                                                                      |                     |             |
| SNZ1      | 4702 | <u>MTGEDFKIKSGLAQMLKGGVI</u> <u>MDVVTPEQAK</u>              | SOR_SNZ (Vitamin B6 biosynthesis)                                    | 1.40E-09            | HMMPfam     |
|           |      | <u>MTGEDFKIKSGLAQMLKGGVI</u> <u>MDVVTPEQAK</u>              | PDXS_SNZ_2 (Vitamin B6 biosynthesis)                                 | 19.276              | ProfileScan |
| YNL174W   | 5118 | <u>MALEFLAATRGMNDLV</u> <u>MSCSVTLLFS</u>                   | Signal Peptide                                                       | NA                  | SignalPHMM  |
| YNL200C   | 5144 | <u>MSTLKVVSSKLAAEIDKEL</u> <u>MGPQIGFTLQ</u>                | n-terminal yjef related                                              | 3.80E-09            | HMMPanther  |
| YNL234W   | 5178 | <u>MTGEKILHSQLLTNSDMSSGNVHHTKP</u> <u>MMYNVTLPSY</u>        | Family Not Named                                                     | 7.80E-16            | HMMPanther  |
| YNL234W   | 5178 | <u>MTGEKILHSQLLTNSDMSSGNVHHTKPM</u> <u>MYNVTLPSYN</u>       | Family Not Named                                                     | 4.20E-16            | HMMPanther  |
| YTP1      | 5181 | <u>MTAANKNIVGFGRSISAILLICFFFEKVC</u> <u>GD MEHDMGMDDT</u>   | signal-peptide                                                       | NA                  | SignalPHMM  |
|           |      | <u>MTAANKNIVGFGRSISAILLICFFFEKVC</u> <u>GD MEHDMGMDDT</u>   | transmembrane_regions                                                | NA                  | TMHMM       |
| MDJ2      | 5272 | <u>MVLPPIIIGLGV</u> <u>MVALSVKSGL</u>                       | signal-peptide                                                       | NA                  | SignalPHMM  |
| YOR214C   | 5740 | <u>MLGLYLSSLFFAFF</u> <u>MAQVFATKYS</u>                     | signal-peptide                                                       | NA                  | SignalPHMM  |
| YPR146C   | 6350 | <u>MQNMLSMHFFSV</u> <u>MASL</u>                             | signal-peptide                                                       | NA                  | SignalPHMM  |
| MLC2      | 6392 | <u>MDHSESLTFNQLTQDYINKLKDAFQ</u> <u>MLDEDEDGLI</u>          | MYOSIN LIGHT CHAIN 2                                                 | 9.20E-17            | HMMPanther  |
|           |      | <u>MDHSESLTFNQLTQDYINKLKDAFQ</u> <u>MLDEDEDGLI</u>          | EF_HAND_2                                                            | 10.218              | ProfileScan |
| MRP10     | 6430 | <u>MSGKPPVYRLLPPLPRLKVKKPIIRQEANKCLVL</u> <u>MSNLLQCWSS</u> | signal-peptide                                                       | NA                  | SignalPHMM  |

|           |       |                                               |                       |    |            |
|-----------|-------|-----------------------------------------------|-----------------------|----|------------|
| YKL018C-A | 7615  | MLGMIRWVVEGTLVAMLLSAIRRETG <u>M</u> IFFYNQYQL | signal-peptide        | NA | SignalPHMM |
| VMA9      | 28508 | <u>M</u> SSFYTVVGVFIVVSA <u>M</u> SVLFWIMAP   | signal-peptide        | NA | SignalPHMM |
|           |       | <u>M</u> SSFYTVVGVFIVVSA <u>M</u> SVLFWIMAP   | transmembrane_regions | NA | TMHMM      |
| YGL006W-A | 28769 | <u>M</u> LIFIIHYHRHLALHL <u>M</u> GAFQKHSNS   | signal-peptide        | NA | SignalPHMM |

34 of 152 frame 1 downPeptide genes have motifs predicted by InterProScan (21) (<http://www.ebi.ac.uk/Tools/InterProScan/>) located between their annAUG and downAUG + 10 residues. Motif regions are underlined in the sequence. Signal peptides detected by InterProScan or SignalP are illustrated in Supplementary Tables S6 and S7.

### Supplementary Table S9.

Gene Ontology terms whose frequencies differ significantly in downPeptide and annPeptide genes

| GO id | GO detail                                            | downPeptide<br>Percent | annPeptide<br>Percent | all<br>genes <sup>1</sup> | top 10%<br>protein<br>expression <sup>2</sup> | chi-<br>square <sup>3</sup> |
|-------|------------------------------------------------------|------------------------|-----------------------|---------------------------|-----------------------------------------------|-----------------------------|
| 3677  | DNA binding<br>structural constituent<br>of ribosome | 0.09                   | 0.05                  | 0.08                      | 0.05                                          | 4.00                        |
| 3735  |                                                      | 0.02                   | 0.06                  | 0.04                      | 0.20                                          | 6.36                        |
| 3824  | catalytic activity                                   | 0.08                   | 0.15                  | 0.08                      | 0.17                                          | 8.30                        |
| 5488  | binding                                              | 0.02                   | 0.07                  | 0.04                      | 0.10                                          | 7.79                        |
| 5622  | intracellular                                        | 0.05                   | 0.10                  | 0.06                      | 0.21                                          | 5.88                        |
| 5737  | cytoplasm                                            | 0.31                   | 0.51                  | 0.33                      | 0.65                                          | 31.24                       |
| 5829  | cytosol                                              | 0.03                   | 0.07                  | 0.07                      | 0.10                                          | 6.22                        |
| 5840  | ribosome                                             | 0.03                   | 0.08                  | 0.05                      | 0.24                                          | 7.19                        |
| 6412  | translation<br>regulation of                         | 0.04                   | 0.10                  | 0.05                      | 0.29                                          | 11.81                       |
| 6417  | translation                                          | 0.02                   | 0.08                  | 0.02                      | 0.20                                          | 11.65                       |
| 8150  | biological_process                                   | 0.21                   | 0.14                  | 0.20                      | 0.02                                          | 6.79                        |
| 16020 | membrane<br>integral to                              | 0.29                   | 0.22                  | 0.26                      | 0.18                                          | 5.22                        |
| 16021 | membrane                                             | 0.22                   | 0.16                  | 0.19                      | 0.11                                          | 5.51                        |
| 16301 | kinase activity                                      | 0.07                   | 0.04                  | 0.03                      | 0.03                                          | 4.69                        |

<sup>1</sup> GO term representation in 6357 annotated yeast genes

<sup>2</sup> top 10 of protein expression based on TAP-epitope tagged expression levels (*I*)

<sup>3</sup> downPeptide and annPeptide frequencies differ significantly by chi-square tests (3.84,  $p = 0.05$ ; 6.64,  $p = 0.01$ ; 10.83,  $p = 0.001$ )

## Supplementary Files

Supplementary File S1: Fournier\_SuppData.xls contains data for detected dnPeptide and annPeptide genes, including the downPeptide sequences and where they map relative to the annAUG. For each peptide, the highest scoring TurboSequest matches are illustrated. Note that some peptides are shown more than once if the same peptide sequence was detected with different amino acid modifications.

1. Ghaemmaghami, S., Huh, W. K., Bower, K., Howson, R. W., Belle, A., Dephoure, N., O'Shea, E. K., and Weissman, J. S. (2003) Global analysis of protein expression in yeast, *Nature* 425, 737-741.
2. Lambert, J. P., Mitchell, L., Rudner, A., Baetz, K., and Figey, D. (2009) A novel proteomics approach for the discovery of chromatin-associated protein networks, *Mol Cell Proteomics* 8, 870-882.
3. Shevchenko, A., Tomas, H., Havlis, J., Olsen, J. V., and Mann, M. (2006) In-gel digestion for mass spectrometric characterization of proteins and proteomes, *Nature protocols* 1, 2856-2860.
4. Robbins-Pianka, A., Rice, M. D., and Weir, M. P. (2010) The mRNA landscape at yeast translation initiation sites, *Bioinformatics* 26, 2651-2655.
5. Weir, M. P., and Rice, M. D. (2010) TRII: A Probabilistic Scoring of Drosophila melanogaster Translation Initiation Sites *EURASIP Journal on Bioinformatics and Systems Biology* 2010.
6. Ingolia, N. T., Ghaemmaghami, S., Newman, J. R., and Weissman, J. S. (2009) Genome-wide analysis in vivo of translation with nucleotide resolution using ribosome profiling, *Science* 324, 218-223.
7. Kellis, M., Patterson, N., Endrizzi, M., Birren, B., and Lander, E. S. (2003) Sequencing and comparison of yeast species to identify genes and regulatory elements, *Nature* 423, 241-254.
8. Kellis, M., Patterson, N., Birren, B., Berger, B., and Lander, E. S. (2004) Methods in comparative genomics: genome correspondence, gene identification and regulatory motif discovery, *J Comput Biol* 11, 319-355.
9. Higgins, D. G., and Sharp, P. M. (1988) CLUSTAL: a package for performing multiple sequence alignment on a microcomputer, *Gene* 73, 237-244.
10. Sharp, P. M., and Li, W. H. (1987) The codon Adaptation Index--a measure of directional synonymous codon usage bias, and its potential applications, *Nucleic Acids Res* 15, 1281-1295.
11. Kochetov, A. V. (2008) Alternative translation start sites and hidden coding potential of eukaryotic mRNAs, *Bioessays* 30, 683-691.
12. Kozak, M. (2002) Pushing the limits of the scanning mechanism for initiation of translation, *Gene* 299, 1-34.

13. Dunker, A. K., Silman, I., Uversky, V. N., and Sussman, J. L. (2008) Function and structure of inherently disordered proteins, *Curr Opin Struct Biol* 18, 756-764.
14. Lewis, S., Ashburner, M., and Reese, M. G. (2000) Annotating eukaryote genomes, *Curr Opin Struct Biol* 10, 349-354.
15. Plevoda, B., and Sherman, F. (2003) N-terminal acetyltransferases and sequence requirements for N-terminal acetylation of eukaryotic proteins, *J Mol Biol* 325, 595-622.
16. Weathers, E. A., Paulaitis, M. E., Woolf, T. B., and Hoh, J. H. (2007) Insights into protein structure and function from disorder-complexity space, *Proteins* 66, 16-28.
17. Ingolia, N. T., Lareau, L. F., and Weissman, J. S. (2011) Ribosome profiling of mouse embryonic stem cells reveals the complexity and dynamics of mammalian proteomes, *Cell* 147, 789-802.
18. Miura, F., Kawaguchi, N., Sese, J., Toyoda, A., Hattori, M., Morishita, S., and Ito, T. (2006) A large-scale full-length cDNA analysis to explore the budding yeast transcriptome, *Proc Natl Acad Sci U S A* 103, 17846-17851.
19. Nagalakshmi, U., Wang, Z., Waern, K., Shou, C., Raha, D., Gerstein, M., and Snyder, M. (2008) The transcriptional landscape of the yeast genome defined by RNA sequencing, *Science* 320, 1344-1349.
20. Petersen, T. N., Brunak, S., von Heijne, G., and Nielsen, H. (2011) SignalP 4.0: discriminating signal peptides from transmembrane regions, *Nature methods* 8, 785-786.
21. Zdobnov, E. M., and Apweiler, R. (2001) InterProScan--an integration platform for the signature-recognition methods in InterPro, *Bioinformatics* 17, 847-848.
